# Supplementary material for: Prediction of Potential Cancer-Risk Regions Based on Transcriptome Data: Towards a Comprehensive View
Source: PubMed Central journal article supplement (PMC4010480; doi:10.1371/journal.pone.0096320), 2014-05-05
Supplement: pone.0096320.s001.pdf [file pone.0096320.s001.pdf]

## Supplementary Figures

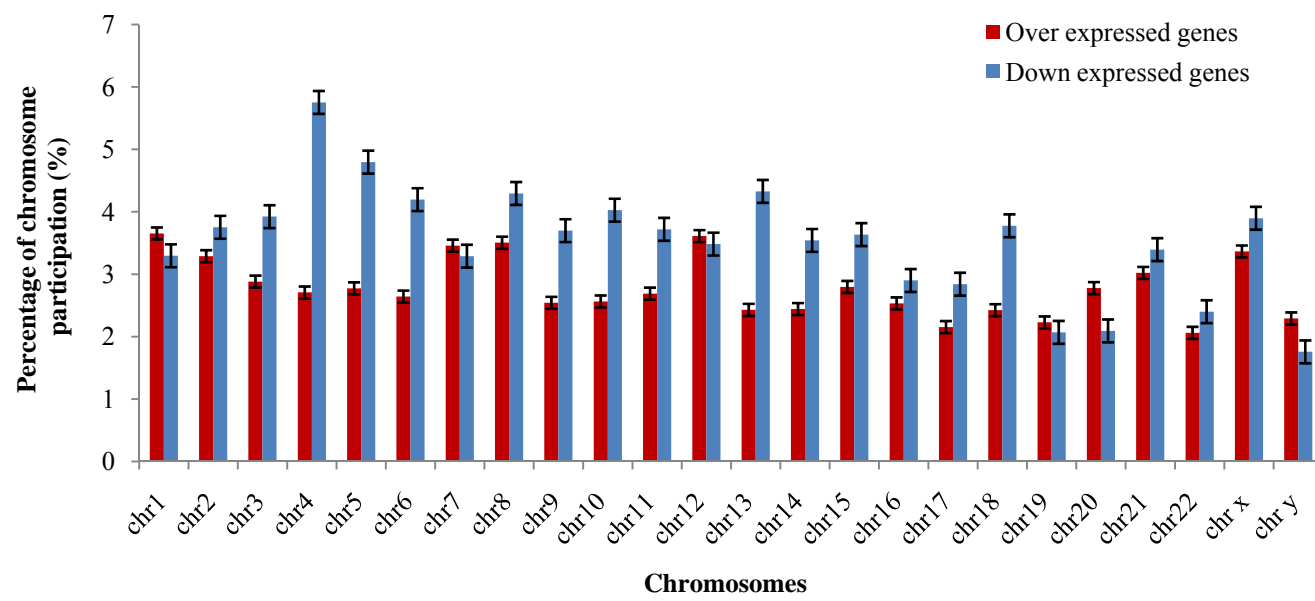

**Figure S1** percentage of chromosome participation in gene expression. these percentages are summation of 11 cancers including breast, endometrial, ovarian, prostate, testicular, colorectal, gastric, liver, pancreatic, lung cancers and glioblastoma. a summary of chromosomal participation of 11 hcs shows significant differences as indicated by general chi-squared test. four top chromosomes harboring the most down-expressed genes were chrs 4, 5, 13 and x, whereas in the case of over-expressed genes the highest numbers of alteration were recorded for chrs 1, 7, 8 and 12 .
