# Supplementary material for: Prediction of Potential Cancer-Risk Regions Based on Transcriptome Data: Towards a Comprehensive View
Source: PubMed Central journal article supplement (PMC4010480; doi:10.1371/journal.pone.0096320), 2014-05-05
Supplement: pone.0096320.s003.pdf [file pone.0096320.s003.pdf]

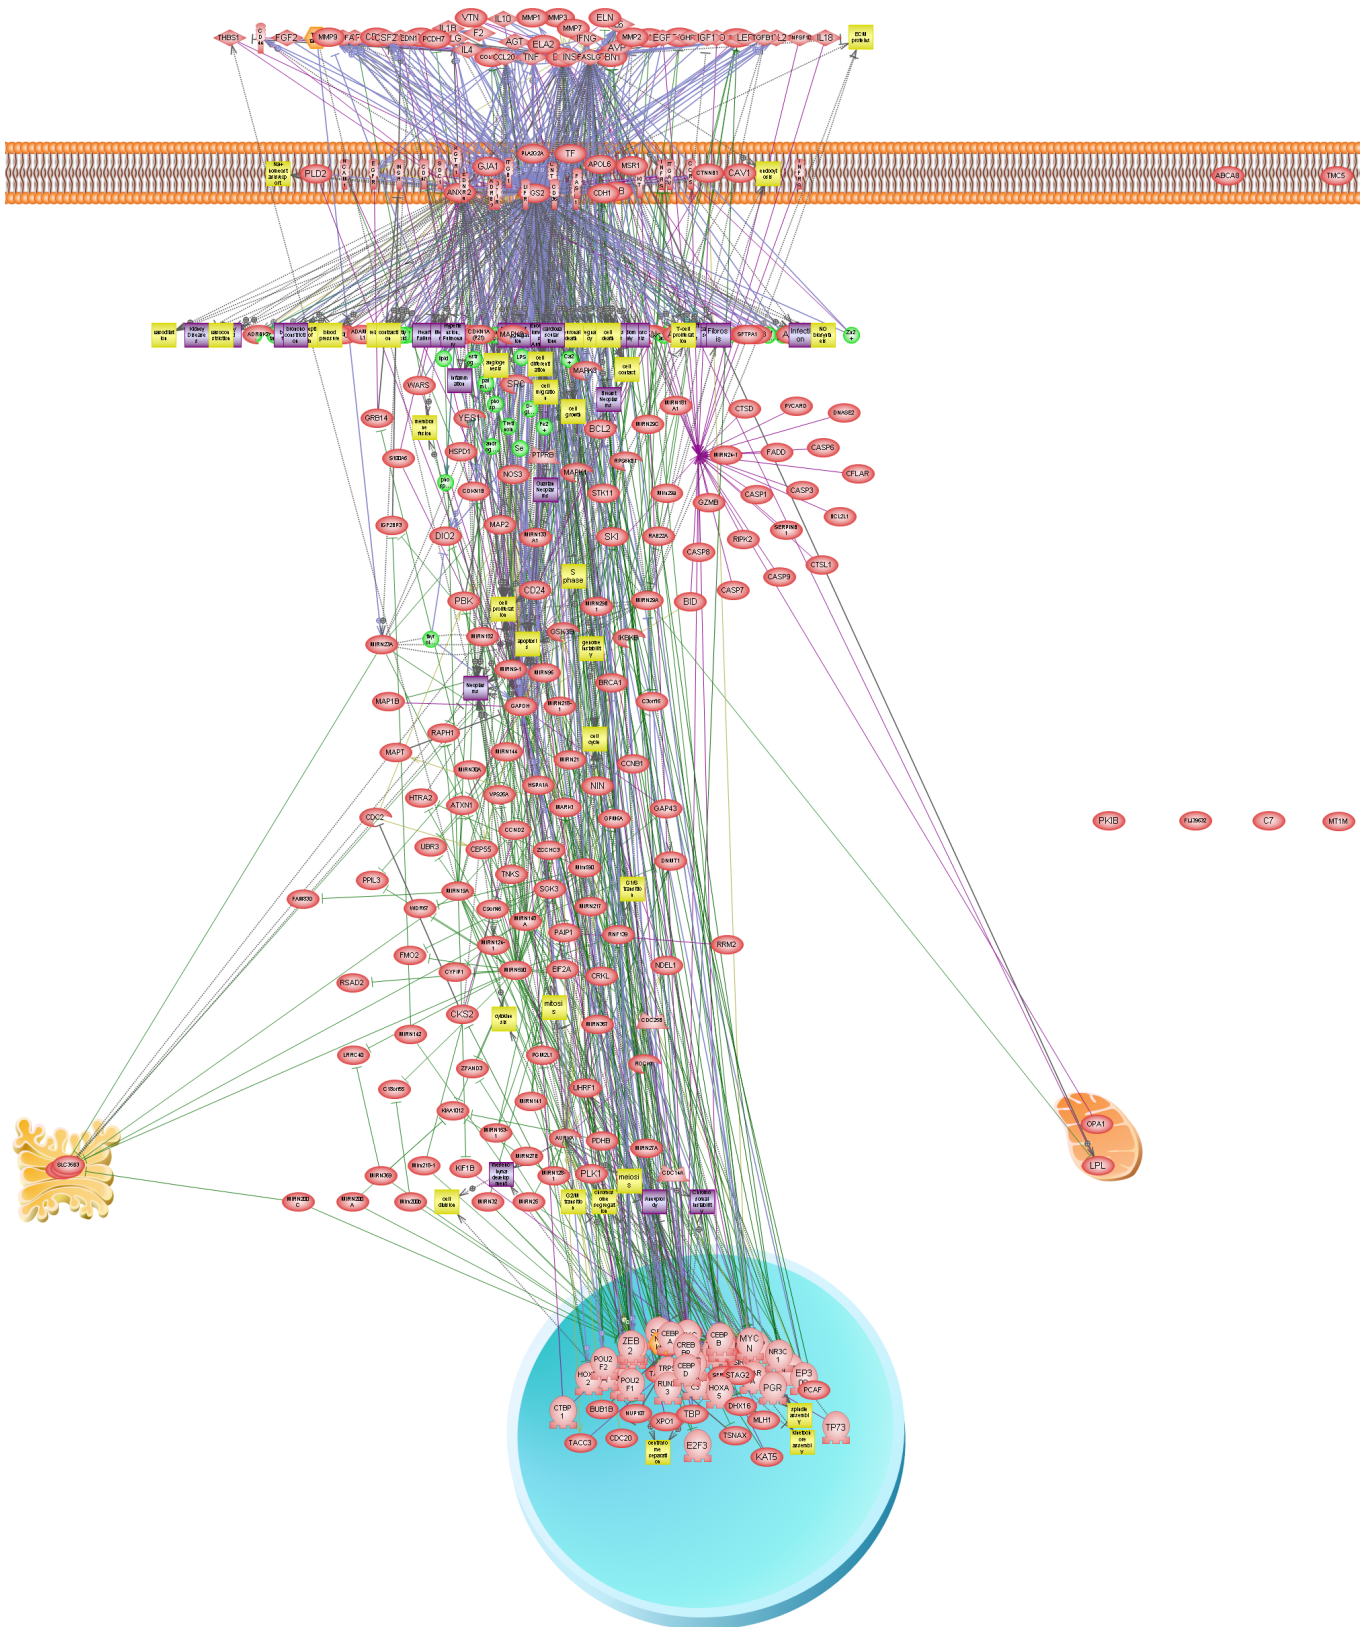

**Figure S3** Network of common altered mRNAs on predicted risk regions in variety of cancers. Network was onstructed using pathway studio 9 software (shortest path algorithm). This network comprises 383 entities and 1121 relations and various type of transcription factors, protein kinases, small molecules, mrnas and mirnas serve as either validated or putative regulators.
