# Supplementary material for: Prediction of Potential Cancer-Risk Regions Based on Transcriptome Data: Towards a Comprehensive View
Source: PubMed Central journal article supplement (PMC4010480; doi:10.1371/journal.pone.0096320), 2014-05-05
Supplement: pone.0096320.s004.pdf [file pone.0096320.s004.pdf]

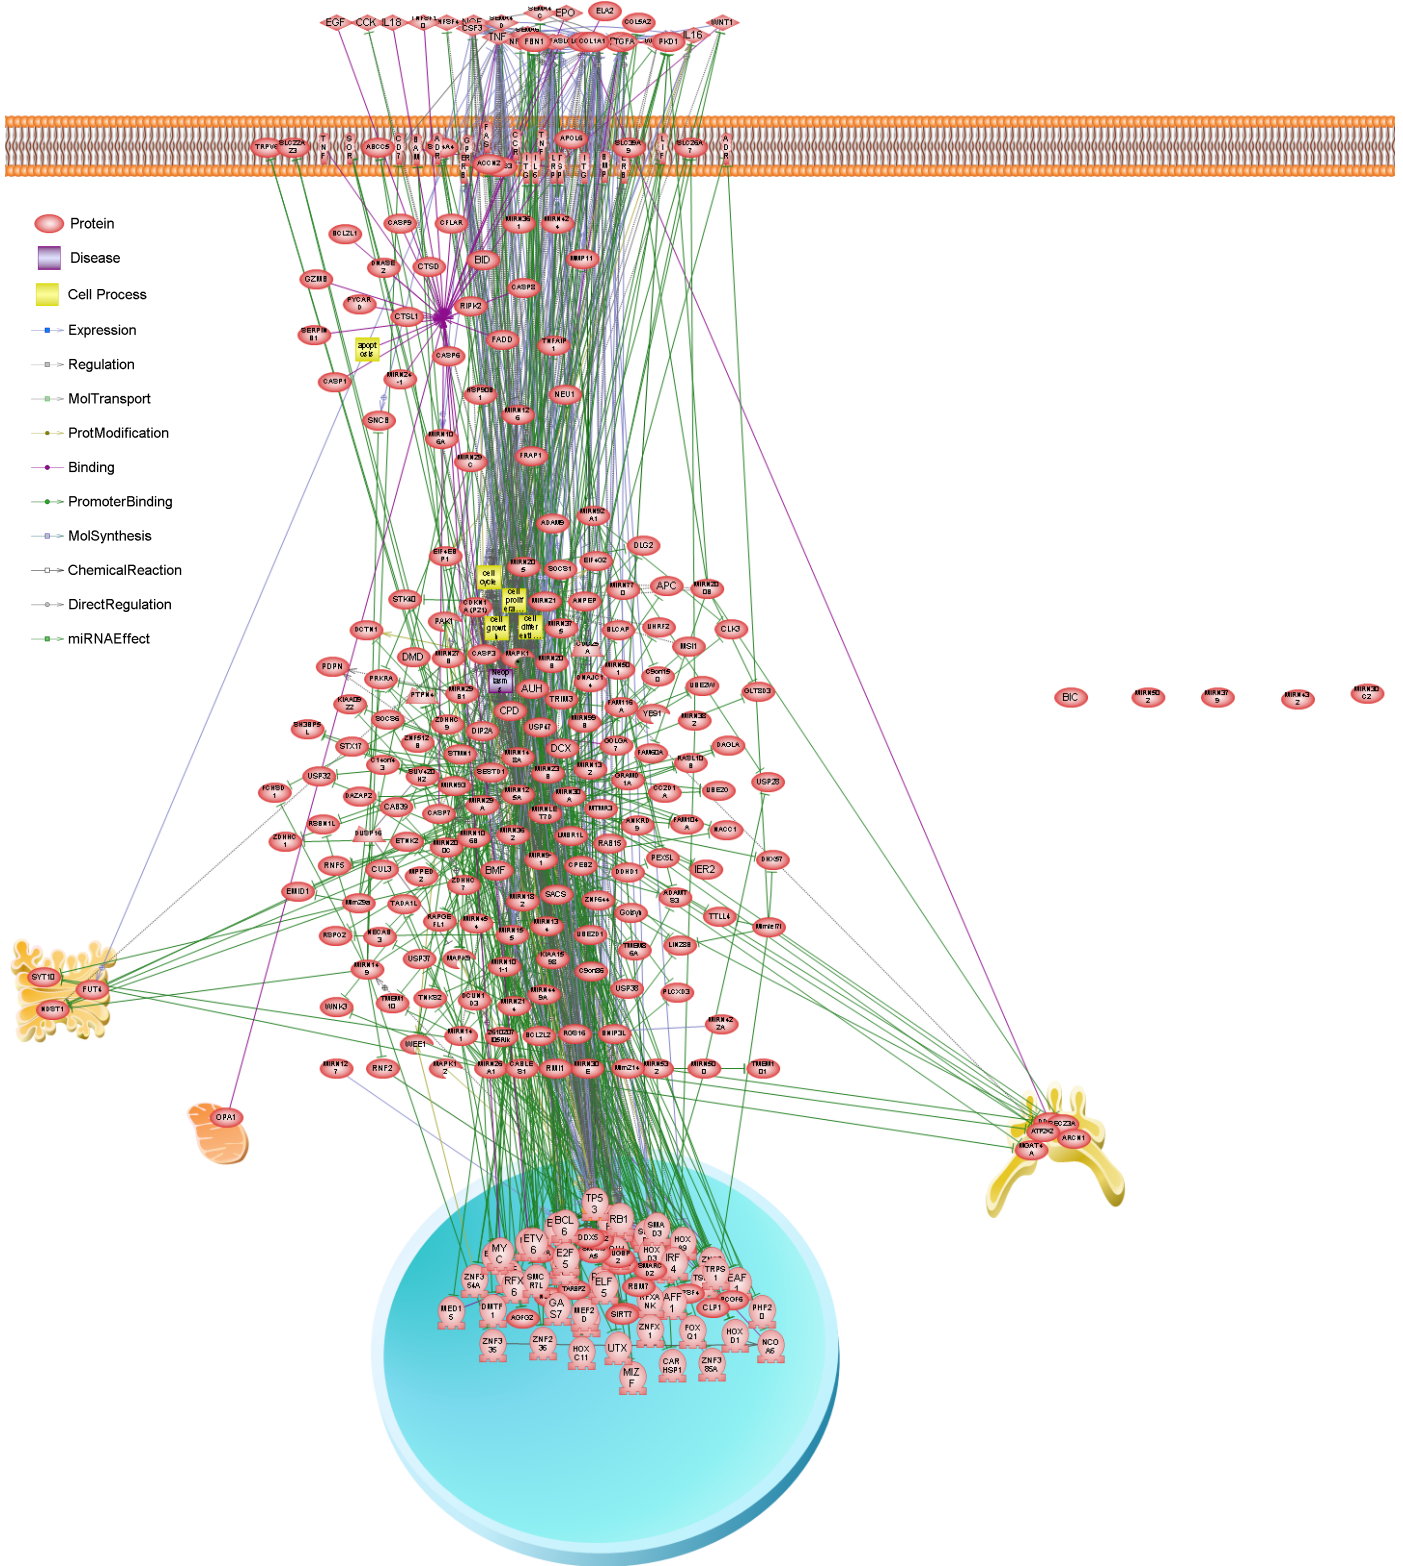

**Figure S4** Network of common altered microRNAs in variety of cancers. Network was constructed using pathway studio 9 software (shortest path algorithm). This network comprises 322 entities and 1041 relations and various type of transcription factors , protein kinases , small molecules , mrnas and mirnas serve as either validated or putative regulators.
