# Supplementary material for: Prediction of Potential Cancer-Risk Regions Based on Transcriptome Data: Towards a Comprehensive View
Source: PubMed Central journal article supplement (PMC4010480; doi:10.1371/journal.pone.0096320), 2014-05-05
Supplement: pone.0096320.s007.pdf [file pone.0096320.s007.pdf]

**Table S1** Number of total and differentially expressed data in different cancers. The number of over-expressed transcripts were ranged from minimum 6 in colorectal and renal cancers (EST data and miRNA expression, respectively) to maximum 6743 in testicular cancer (transcript microarray datasets). In contrast, the range of down-expressed transcripts changed from 4 in ovarian cancer to 4984 in testicular cancer (EST data and transcript microarray datasets, respectively).

| Cancer                          | Number of total and differentially expressed Data |                                              |                                |                                               |                |             |                              |                |                      |                      |
|---------------------------------|---------------------------------------------------|----------------------------------------------|--------------------------------|-----------------------------------------------|----------------|-------------|------------------------------|----------------|----------------------|----------------------|
|                                 | Transcript microarray datasets                    |                                              |                                | Digital differential display of EST libraries |                |             | MicroRNA expression datasets |                |                      |                      |
|                                 | Total Probsets                                    | OE <sup>a</sup> Probsets (2FC <sup>c</sup> ) | DE <sup>b</sup> Probsets (2FC) | Total ESTs <sup>d</sup>                       | Total Unigenes | OE Unigenes | DE Unigenes                  | Total Probsets | OE Probsets (1.5 FC) | DE Probsets (1.5 FC) |
| Breast                          | 54675                                             | 1283                                         | 1672                           | 44433                                         | 130            | 77          | 53                           | -              | -                    | -                    |
| Endometrial                     | 54675                                             | 1113                                         | 2024                           | 103974                                        | 251            | 136         | 115                          | -              | -                    | -                    |
| Ovarian                         | 54675                                             | 1219                                         | 4865                           | 18335                                         | 12             | 8           | 4                            | 574            | 71                   | 22                   |
| Prostate                        | 54675                                             | 557                                          | 582                            | 84272                                         | 189            | 129         | 60                           | 830            | 19                   | 16                   |
| Testicular                      | 54675                                             | 6743                                         | 4984                           | 106842                                        | 307            | 165         | 142                          | -              | -                    | -                    |
| Colorectal                      | 54675                                             | 530                                          | 1490                           | 37467                                         | 71             | 6           | 65                           | -              | -                    | -                    |
| Gastric                         | 54675                                             | 528                                          | 547                            | 28373                                         | 88             | 41          | 47                           | -              | -                    | -                    |
| Liver                           | 54675                                             | 1365                                         | 1283                           | 87656                                         | 238            | 148         | 90                           | -              | -                    | -                    |
| Pancreatic                      | 54675                                             | 274                                          | 159                            | 145115                                        | 457            | 301         | 156                          | -              | -                    | -                    |
| Brain                           | 54675                                             | 1560                                         | 1133                           | 128031                                        | 467            | 201         | 266                          | -              | -                    | -                    |
| Lung                            | 54675                                             | 1974                                         | 2663                           | 137465                                        | 236            | 125         | 111                          | -              | -                    | -                    |
| Renal                           | -                                                 | -                                            | -                              | -                                             | -              | -           | -                            | 830            | 6                    | 72                   |
| Cervical                        | -                                                 | -                                            | -                              | -                                             | -              | -           | -                            | 1082           | 50                   | 136                  |
| Bladder                         | -                                                 | -                                            | -                              | -                                             | -              | -           | -                            | 830            | 33                   | 10                   |
| intestine neuroendocrine tumors | -                                                 | -                                            | -                              | -                                             | -              | -           | -                            | 830            | 67                   | 59                   |

<sup>a</sup>Over expressed. <sup>b</sup>Down expressed. <sup>c</sup>Fold change. <sup>d</sup>Summation of both normal and cancerous EST libraries.
