# Supplementary material for: Prediction of Potential Cancer-Risk Regions Based on Transcriptome Data: Towards a Comprehensive View
Source: PubMed Central journal article supplement (PMC4010480; doi:10.1371/journal.pone.0096320), 2014-05-05
Supplement: pone.0096320.s008.pdf [file pone.0096320.s008.pdf]

**Table S2** Predicted potential cancer-susceptibility regions (PSCRs) using microarray datasets of 11 cancers including, breast, endometrial, ovarian, prostate, testicular, colorectal, liver, gastric, pancreatic, lung cancers and glioblastoma . The percentage of region participation in cancer was calculated for first 200 probset with higher symmetrical fold changes.

| Chromosome | Five Top Regions with highest percentage (%) |                |         |        |        |        |                |         |        |        |        |
|------------|----------------------------------------------|----------------|---------|--------|--------|--------|----------------|---------|--------|--------|--------|
|            |                                              | Over-expressed |         |        |        |        | Down-expressed |         |        |        |        |
| 1          | Region                                       | p11.2          | p21.1   | p31.2  | q31.3  | q32.3  | p21.1          | p22.3   | q24.3  | q31.1  | q31.3  |
|            | Percentage                                   | 3.79           | 6.22    | 9.09   | 2.22   | 1.41   | 0.96           | 1.12    | 1.06   | 2.16   | 1.11   |
| 2          | Region                                       | p24.2          | p25.2   | q12.3  | q22.2  | q32.2  | p12            | p23.1   | p25.2  | q12.2  | q32.3  |
|            | Percentage                                   | 1.21           | 2.27    | 1.62   | 1.52   | 1.44   | 1.65           | 1.65    | 1.36   | 1.21   | 1.14   |
| 3          | Region                                       | q12.1          | q24     | q25.33 | q26.2  | q28    | p12.1          | p12.3   | q12.2  | q25.2  | q26.1  |
|            | Percentage                                   | 1.89           | 1.16    | 1.25   | 0.86   | 1.65   | 1.82           | 1.65    | 3.64   | 1.58   | 2.27   |
| 4          | Region                                       | p15.1          | p15.31  | q22.3  | q28.3  | q32.1  | q13.3          | q23     | q27    | q34.1  | q34.2  |
|            | Percentage                                   | 3.64           | 1.58    | 2.8    | 1.3    | 1.14   | 2.47           | 2.62    | 2.05   | 3.39   | 7.58   |
| 5          | Region                                       | q12.1          | q13.3   | q14.2  | q31.2  | q33.2  | p13.1          | p14.2   | p15.1  | q22.1  | q22.3  |
|            | Percentage                                   | 0.97           | 1.49    | 1.52   | 1.07   | 0.93   | 3.03           | 1.82    | 0.85   | 1.14   | 0.79   |
| 6          | Region                                       | p21.32         | p25.3   | q13    | q22.1  | q22.32 | p24.1          | q14.2   | q14.3  | q16.1  | q22.31 |
|            | Percentage                                   | 1.54           | 1.14    | 1.44   | 1.82   | 0.83   | 1.73           | 2.42    | 1.21   | 1.76   | 1.92   |
| 7          | Region                                       | p14.1          | p14.2   | p15.2  | p15.3  | p21.1  | p15.1          | p21.2   | q21.11 | q21.3  | q31.2  |
|            | Percentage                                   | 2.83           | 2.14    | 1.44   | 1.26   | 1.69   | 1.82           | 1.14    | 2.6    | 1.65   | 2.05   |
| 8          | Region                                       | q13.2          | q21.13  | q22.1  | q22.3  | q24.22 | p21.1          | p22     | q21.11 | q21.2  | q23.2  |
|            | Percentage                                   | 4.22           | 2.18    | 1.11   | 1.12   | 1.22   | 2.07           | 1.34    | 1.68   | 1.82   | 3.64   |
| 9          | Region                                       | q21.2          | q22.2   | q31.2  | q33.1  | q34.12 | q21.11         | q21.12  | q21.13 | q22.31 | q33.1  |
|            | Percentage                                   | 1.52           | 1.82    | 1.38   | 0.87   | 1.21   | 1.27           | 1.7     | 0.92   | 1.32   | 2.81   |
| 10         | Region                                       | p15.2          | q21.1   | q21.2  | q23.33 | q26.2  | q21.1          | q22.3   | q23.2  | q23.33 | q25.3  |
|            | Percentage                                   | 1.01           | 1.27    | 2.56   | 2.16   | 1.95   | 1.27           | 0.88    | 0.81   | 1.15   | 1.03   |
| 11         | Region                                       | p11.12         | p14.2   | p15.2  | q14.3  | q22.2  | p14.1          | p14.2   | p15.3  | q23.2  | q24.1  |
|            | Percentage                                   | 1.82           | 1.4     | 0.83   | 0.91   | 7.58   | 1.19           | 1.4     | 1.11   | 2.31   | 1.04   |
| 12         | Region                                       | p11.22         | p12.2   | p13.31 | q13.11 | q21.1  | p12.3          | p13.1   | q14.3  | q21.1  | q21.33 |
|            | Percentage                                   | 1.1            | 1.95    | 0.82   | 0.8    | 0.88   | 1.12           | 0.95    | 1.07   | 1.17   | 2.39   |
| 13         | Region                                       | q13.2          | q13.3   | q21.1  | q22.3  | q31.2  | q13.3          | q14.11  | q21.1  | q21.32 | q22.3  |
|            | Percentage                                   | 2.27           | 1.15    | 1.14   | 1.14   | 1.3    | 2.02           | 0.51    | 2.27   | 1.3    | 2.65   |
| 14         | Region                                       | q11.2          | q22.1   | q22.2  | q22.3  | q23.1  | q23.2          | q24.1   | q31.1  | q31.3  | q32.2  |
|            | Percentage                                   | 0.85           | 0.6     | 1.82   | 0.6    | 0.9    | 0.73           | 0.51    | 0.78   | 0.95   | 0.84   |
| 15         | Region                                       | q12            | q13.3   | q15.1  | q21.3  | q22.2  | q12            | q13.3   | q21.1  | q22.33 | q26.2  |
|            | Percentage                                   | 1.82           | 1.86    | 1.01   | 1.4    | 1.02   | 0.91           | 0.93    | 0.98   | 1.14   | 1.82   |
| 16         | Region                                       | p12.3          | q12.1   | q12.2  | q21    | q24.2  | p12.3          | p13.11  | q12.2  | q13    | q23.2  |
|            | Percentage                                   | 0.62           | 0.68    | 0.46   | 1.03   | 0.49   | 1.14           | 0.86    | 1.5    | 0.97   | 0.68   |
| 17         | Region                                       | p12            | q21.2   | q21.33 | q22    | q24.3  | p11.2          | q21.33  | q23.1  | q24.2  | q24.3  |
|            | Percentage                                   | 0.48           | 1.08    | 0.64   | 0.54   | 1.75   | 0.38           | 0.32    | 1.17   | 1.3    | 0.7    |
| 18         | Region                                       | p11.22         | p11.32  | q12.1  | q21.31 | q21.33 | p11.31         | q11.2   | q12.1  | q21.2  | q21.31 |
|            | Percentage                                   | 0.71           | 0.89    | 0.97   | 0.7    | 1.22   | 1.1            | 1.65    | 0.73   | 0.61   | 0.7    |
| 19         | Region                                       | p12            | q13.2   | q13.32 | q13.33 | q13.41 | p13.2          | p13.3   | q12    | q13.2  | q13.32 |
|            | Percentage                                   | 0.57           | 0.41    | 0.45   | 0.36   | 0.38   | 0.26           | 0.18    | 0.88   | 0.66   | 0.25   |
| 20         | Region                                       | p11.21         | p12.3   | q11.23 | q13.2  | q13.31 | p11.21         | p12.1   | p12.3  | q11.23 | q13.31 |
|            | Percentage                                   | 0.92           | 0.7     | 0.71   | 2.14   | 2.05   | 0.26           | 0.44    | 0.56   | 0.24   | 0.59   |
| 21         | Region                                       | p11.1          | p11.2   | q11.2  | q22.12 | q22.3  | q21.1          | q21.3   | q22.11 | q22.12 | q22.13 |
|            | Percentage                                   | 1.52           | 1.01    | 0.53   | 0.87   | 0.45   | 0.19           | 1.01    | 0.21   | 0.43   | 1.27   |
| 22         | Region                                       | q11.23         | q12.1   | q12.2  | q12.3  | q13.32 | q11.22         | q11.23  | q12.1  | q13.1  | q13.33 |
|            | Percentage                                   | 0.2            | 0.25    | 0.12   | 0.08   | 1.52   | 0.46           | 0.1     | 0.49   | 0.25   | 0.22   |
| x          | Region                                       | p21.1          | p22.32  | q12    | q22.1  | q26.2  | p22.32         | q21.32  | q22.1  | q22.3  | q23    |
|            | Percentage                                   | 1.52           | 2.27    | 1.24   | 0.88   | 3.31   | 2.27           | 6.06    | 1.64   | 2.27   | 1.88   |
| y          | Region                                       | p11.31         | q11.222 |        |        |        | p11.31         | q11.223 | q11.23 |        |        |
|            | Percentage                                   | 0.7            | 2.89    |        |        |        | 0.7            | 1.65    | 2.27   |        |        |

<sup>3</sup>Percentage: the fraction of altered probsets frequency for each region to the correspondence frequency of total probsets on microarray chip at the same region.
