# Supplementary material for: Prediction of Potential Cancer-Risk Regions Based on Transcriptome Data: Towards a Comprehensive View
Source: PubMed Central journal article supplement (PMC4010480; doi:10.1371/journal.pone.0096320), 2014-05-05
Supplement: pone.0096320.s009.pdf [file pone.0096320.s009.pdf]

**Table S3** The percentage of chromosome participation for differentially expressed genes obtained from microarray analysis of 11 cancers including breast, endometrial, ovarian, prostate, testicular, colorectal, liver, gastric, pancreatic, lung cancers and glioblastoma. chr4 is harboring the highest number of genes altered in cancer (excluding prostate and gastric cancers). In contrast, chrY has the lowest number of genes expressed in cancer.

| Chr. | Breast          |                 | Endometrial |      | Ovarian |      | Prostate |      | Testicular |       | Brain |      | Lung |      | Colorectal |      | Gastric |      | Liver |      | Pancreatic |      |
|------|-----------------|-----------------|-------------|------|---------|------|----------|------|------------|-------|-------|------|------|------|------------|------|---------|------|-------|------|------------|------|
|      | <sup>a</sup> DE | <sup>b</sup> OE | DE          | OE   | DE      | OE   | DE       | OE   | DE         | OE    | DE    | OE   | DE   | OE   | DE         | OE   | DE      | OE   | DE    | OE   | DE         | OE   |
| 1    | 2.82            | 2.41            | 3.11        | 2.74 | 8.65    | 2.65 | 1.10     | 0.78 | 7.39       | 17.64 | 1.77  | 2.97 | 4.81 | 4.01 | 2.70       | 0.97 | 1.31    | 1.04 | 2.24  | 4.40 | 0.35       | 0.58 |
| 2    | 3.53            | 2.67            | 3.84        | 3.03 | 8.83    | 2.64 | 1.20     | 1.07 | 9.93       | 15.42 | 2.25  | 2.59 | 4.97 | 3.89 | 2.98       | 0.71 | 1.20    | 1.41 | 2.17  | 2.14 | 0.37       | 0.60 |
| 3    | 3.56            | 1.83            | 3.90        | 1.29 | 9.29    | 2.64 | 1.57     | 0.85 | 10.45      | 11.77 | 2.39  | 3.40 | 5.57 | 5.38 | 3.02       | 0.60 | 0.82    | 0.82 | 2.36  | 2.64 | 0.22       | 0.47 |
| 4    | 4.24            | 2.75            | 5.59        | 2.07 | 14.96   | 1.85 | 1.35     | 1.53 | 14.02      | 10.59 | 3.38  | 3.06 | 6.80 | 2.97 | 5.63       | 1.13 | 1.67    | 1.04 | 5.05  | 1.71 | 0.59       | 1.08 |
| 5    | 4.00            | 3.29            | 4.47        | 2.82 | 11.99   | 2.27 | 1.14     | 1.25 | 15.24      | 9.48  | 2.70  | 2.43 | 5.84 | 3.41 | 3.80       | 1.02 | 1.29    | 1.29 | 2.27  | 3.02 | 0.04       | 0.24 |
| 6    | 3.62            | 2.69            | 3.87        | 2.14 | 9.77    | 1.76 | 1.24     | 1.17 | 12.08      | 6.77  | 2.52  | 4.11 | 6.63 | 3.87 | 3.04       | 1.04 | 0.97    | 0.86 | 2.17  | 4.07 | 0.24       | 0.59 |
| 7    | 3.66            | 2.15            | 3.63        | 1.22 | 8.58    | 2.03 | 1.15     | 1.33 | 6.70       | 15.32 | 1.55  | 5.51 | 4.59 | 3.33 | 2.52       | 1.41 | 0.96    | 1.70 | 2.40  | 3.18 | 0.44       | 0.85 |
| 8    | 4.67            | 2.59            | 4.87        | 2.59 | 9.79    | 3.86 | 1.17     | 1.62 | 13.04      | 10.71 | 2.99  | 3.81 | 5.02 | 5.23 | 2.49       | 1.73 | 0.71    | 1.37 | 2.33  | 4.57 | 0.15       | 0.51 |
| 9    | 3.25            | 2.35            | 4.24        | 1.51 | 9.98    | 1.41 | 0.94     | 0.89 | 8.15       | 13.47 | 2.07  | 2.59 | 4.94 | 2.64 | 2.54       | 0.61 | 0.89    | 0.47 | 3.39  | 1.32 | 0.28       | 0.71 |
| 10   | 3.22            | 2.72            | 3.67        | 2.49 | 8.25    | 2.09 | 0.86     | 0.77 | 12.38      | 8.70  | 3.76  | 1.99 | 5.26 | 3.81 | 2.99       | 0.82 | 1.27    | 0.95 | 2.36  | 3.31 | 0.27       | 0.54 |
| 11   | 2.89            | 2.59            | 3.37        | 2.01 | 8.27    | 3.00 | 1.19     | 1.36 | 10.89      | 9.39  | 1.67  | 3.34 | 5.55 | 3.37 | 2.79       | 0.88 | 1.09    | 0.99 | 2.93  | 2.14 | 0.27       | 0.51 |
| 12   | 2.99            | 2.41            | 3.85        | 2.38 | 8.64    | 2.45 | 1.15     | 1.15 | 7.06       | 19.45 | 2.70  | 2.95 | 4.83 | 4.50 | 2.77       | 0.94 | 0.76    | 0.72 | 3.31  | 2.16 | 0.25       | 0.61 |
| 13   | 3.76            | 2.16            | 5.76        | 2.00 | 12.00   | 1.84 | 1.04     | 2.16 | 10.80      | 9.60  | 2.80  | 2.16 | 6.56 | 1.52 | 1.76       | 2.08 | 0.32    | 1.12 | 2.72  | 1.52 | 0.08       | 0.56 |
| 14   | 3.40            | 1.78            | 2.79        | 2.45 | 9.48    | 2.23 | 0.78     | 0.78 | 9.70       | 8.42  | 1.73  | 1.73 | 3.68 | 4.29 | 3.96       | 0.61 | 1.23    | 1.17 | 1.67  | 3.07 | 0.56       | 0.33 |
| 15   | 2.43            | 2.60            | 4.19        | 2.26 | 11.26   | 2.09 | 1.02     | 1.02 | 9.05       | 12.67 | 2.71  | 1.70 | 4.07 | 3.51 | 2.71       | 0.57 | 0.85    | 1.02 | 1.41  | 2.88 | 0.28       | 0.45 |
| 16   | 1.69            | 2.80            | 2.89        | 1.54 | 7.37    | 1.54 | 0.77     | 0.82 | 5.01       | 14.75 | 1.30  | 1.59 | 4.34 | 2.22 | 2.75       | 0.72 | 1.54    | 0.43 | 3.47  | 1.06 | 0.77       | 0.39 |
| 17   | 2.12            | 1.84            | 2.70        | 1.73 | 7.25    | 1.70 | 0.94     | 0.52 | 8.77       | 8.11  | 1.25  | 2.70 | 4.09 | 3.50 | 1.60       | 0.97 | 0.73    | 0.94 | 1.60  | 1.42 | 0.21       | 0.24 |
| 18   | 3.08            | 2.05            | 3.18        | 1.33 | 12.51   | 1.13 | 1.33     | 0.82 | 7.59       | 8.82  | 2.56  | 2.87 | 4.21 | 5.74 | 4.10       | 0.51 | 1.13    | 1.03 | 1.44  | 2.05 | 0.41       | 0.31 |
| 19   | 1.30            | 1.89            | 3.29        | 1.16 | 3.85    | 2.07 | 0.49     | 0.53 | 5.81       | 12.89 | 0.60  | 1.65 | 3.85 | 1.96 | 1.02       | 0.77 | 0.49    | 0.56 | 2.00  | 0.67 | 0.07       | 0.39 |
| 20   | 2.84            | 1.72            | 2.58        | 2.12 | 5.29    | 2.71 | 0.66     | 0.53 | 4.37       | 10.65 | 1.19  | 3.04 | 4.03 | 3.37 | 0.73       | 2.91 | 0.26    | 1.26 | 1.06  | 1.92 | 0.00       | 0.33 |
| 21   | 3.07            | 2.78            | 5.71        | 1.61 | 7.03    | 3.51 | 0.73     | 2.20 | 7.91       | 15.52 | 1.17  | 2.34 | 4.69 | 1.46 | 2.64       | 1.02 | 2.05    | 0.59 | 2.20  | 1.61 | 0.15       | 0.59 |
| 22   | 2.99            | 2.58            | 1.86        | 1.37 | 4.52    | 1.37 | 0.40     | 0.48 | 8.23       | 8.31  | 0.89  | 1.69 | 2.42 | 4.68 | 2.82       | 0.40 | 1.05    | 0.48 | 0.89  | 1.29 | 0.32       | 0.00 |
| X    | 3.88            | 2.15            | 5.31        | 1.67 | 11.28   | 1.79 | 1.85     | 0.66 | 7.10       | 18.39 | 2.15  | 3.82 | 5.19 | 4.06 | 3.10       | 1.13 | 0.60    | 0.78 | 1.97  | 2.15 | 0.42       | 0.42 |
| Y    | 0.00            | 0.00            | 0.00        | 0.00 | 2.52    | 2.52 | 0.84     | 0.84 | 7.56       | 8.40  | 0.00  | 8.40 | 3.36 | 2.52 | 0.00       | 0.00 | 5.04    | 0.00 | 0.00  | 2.52 | 0.00       | 0.00 |

<sup>a</sup>Down expressed. <sup>b</sup>Over expressed. <sup>c</sup> Percentage of chromosome participation
