# Supplementary material for: Prediction of Potential Cancer-Risk Regions Based on Transcriptome Data: Towards a Comprehensive View
Source: PubMed Central journal article supplement (PMC4010480; doi:10.1371/journal.pone.0096320), 2014-05-05
Supplement: pone.0096320.s011.pdf [file pone.0096320.s011.pdf]

**Table S5** Common entities observed between different constructed cancer networks. Zinc finger E-box binding homeobox 2 (ZEB2), DEAD (Asp-Glu-Ala-Asp) box helicase 5 (DDX5) and leukemia inhibitory factor receptor alpha (LIFR) and also mir-21, mir-30a, mir-141 and mir-200c were shared between both constructed networks of common altered mRNAs and miRNAs (from 11 cancers: breast, colorectal, endometrial, gastric, liver, lung, ovarian, pancreatic, prostate and testicular cancers as well as glioblastoma).

| Common entities between network of total genes and network of total microRNAs |          |           | Common entities between network of genes on predicted cancer risk loci and network of total microRNAs |          |           | Common entities between network of genes on predicted cancer risk loci and network of microRNAs on predicted cancer risk loci |  | Common entities between network of genes and network of microRNAs on predicted cancer risk loci |  |
|-------------------------------------------------------------------------------|----------|-----------|-------------------------------------------------------------------------------------------------------|----------|-----------|-------------------------------------------------------------------------------------------------------------------------------|--|-------------------------------------------------------------------------------------------------|--|
| ADRB2                                                                         | E2F1     | MIRN29B1  | ADRB2                                                                                                 | ELA2     | MIRN30A   | ADRB2                                                                                                                         |  | ADRB2                                                                                           |  |
| APOL6                                                                         | EGF      | MIRN29C   | APOL6                                                                                                 | EPO      | MIRN9-1   | ATXN1                                                                                                                         |  | ATXN1                                                                                           |  |
| apoptosis                                                                     | ELA2     | MIRN30A   | apoptosis                                                                                             | FADD     | MYC       | cell differentiation                                                                                                          |  | cell differentiation                                                                            |  |
| BCL2L1                                                                        | EPO      | MIRN9-1   | BCL2L1                                                                                                | FAS      | Neoplasms | cell growth                                                                                                                   |  | cell growth                                                                                     |  |
| BID                                                                           | FADD     | MYC       | BID                                                                                                   | FASLG    | NF-kB     | cell proliferation                                                                                                            |  | cell proliferation                                                                              |  |
| CASP1                                                                         | FAS      | Neoplasms | CASP1                                                                                                 | FBN1     | OPA1      | CRKL                                                                                                                          |  | CRKL                                                                                            |  |
| CASP3                                                                         | FASLG    | NF-kB     | CASP3                                                                                                 | FN1      | PYCARD    | FN1                                                                                                                           |  | DDX5                                                                                            |  |
| CASP6                                                                         | FN1      | NGF       | CASP6                                                                                                 | GZMB     | RIPK2     | MIRN141                                                                                                                       |  | FN1                                                                                             |  |
| CASP7                                                                         | GZMB     | OPA1      | CASP7                                                                                                 | HOXA5    | TGFB1     | MIRN200C                                                                                                                      |  | MAPK14                                                                                          |  |
| CASP8                                                                         | HOXA5    | PYCARD    | CASP8                                                                                                 | IL18     | TNF       | MIRN21                                                                                                                        |  | MIRN141                                                                                         |  |
| CASP9                                                                         | IL18     | RB1       | CASP9                                                                                                 | LIFR     | TNFRSF10B | MIRN30A                                                                                                                       |  | MIRN200C                                                                                        |  |
| CCR5                                                                          | LIFR     | RIPK2     | CCR5                                                                                                  | MIRN141  | TNFRSF1A  | Neoplasms                                                                                                                     |  | MIRN21                                                                                          |  |
| cell cycle                                                                    | MAPK14   | SERPINB1  | CDKN1A (P21)                                                                                          | MIRN148A | TNFSF10   | NF-kB                                                                                                                         |  | MIRN30A                                                                                         |  |
| cell differentiation                                                          | MIRN141  | SMAD3     | cell cycle                                                                                            | MIRN182  | TP53      | TGFB1                                                                                                                         |  | Neoplasms                                                                                       |  |
| cell growth                                                                   | MIRN148A | TGFB1     | cell differentiation                                                                                  | Mir200b  | TRPS1     | TNF                                                                                                                           |  | NF-kB                                                                                           |  |
| cell proliferation                                                            | MIRN182  | TNF       | cell growth                                                                                           | MIRN200C | VEGFA     | TRPS1                                                                                                                         |  | RB1                                                                                             |  |
| CFLAR                                                                         | MIRN200B | TNFRSF10B | cell proliferation                                                                                    | MIRN21   | YES1      | VEGFA                                                                                                                         |  | SMAD3                                                                                           |  |
| COL1A1                                                                        | MIRN200C | TNFRSF1A  | CFLAR                                                                                                 | MIRN24-1 |           | ZEB2                                                                                                                          |  | TGFB1                                                                                           |  |
| CTSD                                                                          | MIRN21   | TNFSF10   | CTSD                                                                                                  | MIRN27B  |           |                                                                                                                               |  | TNF                                                                                             |  |
| CTSL1                                                                         | MIRN24-1 | TP53      | CTSL1                                                                                                 | Mir29a   |           |                                                                                                                               |  | TRPS1                                                                                           |  |
| DDX5                                                                          | MIRN27B  | TRPS1     | DNASE2                                                                                                | MIRN29B1 |           |                                                                                                                               |  | VEGFA                                                                                           |  |
| DNASE2                                                                        | Mir29a   | VEGFA     | EGF                                                                                                   | MIRN29C  |           |                                                                                                                               |  | ZEB2                                                                                            |  |
