# Supplementary material for: Prediction of Potential Cancer-Risk Regions Based on Transcriptome Data: Towards a Comprehensive View
Source: PubMed Central journal article supplement (PMC4010480; doi:10.1371/journal.pone.0096320), 2014-05-05
Supplement: pone.0096320.s012.pdf [file pone.0096320.s012.pdf]

**Table S6** Expression patterns of common predicted regulators of over-expressed RNAs in different cancers (cancer data of 11 microarray studies: breast, colorectal, endometrial, gastric, liver, lung, ovarian, pancreatic, prostate and testicular cancers as well as glioblastoma). Among 18 common predicted TFs for over-expressed mRNAs, Kruppel-Like Factor 4 (KLF4) located at PCSRs was found to be down-expressed in 7 types of cancers.

| Gene symbol      | Region    | Pvalue  | <sup>a</sup> PCSR | Breast | Endometrial | Ovarian | Prostate | Testicular | Colorectal | Liver | Gastric | Pancreatic | Glioblastoma | Lung |
|------------------|-----------|---------|-------------------|--------|-------------|---------|----------|------------|------------|-------|---------|------------|--------------|------|
| <b>NFYA</b>      | 6p21.1    | 0.00004 | -                 |        |             |         |          |            |            |       |         |            |              |      |
| <b>INSM1</b>     | 20p11.23  | 0.02443 | -                 |        |             |         |          |            |            |       |         |            |              |      |
| <b>Gfi1</b>      | 1p22.1    | 0.02938 | -                 |        |             |         |          |            |            |       |         |            |              |      |
| <b>API (JUN)</b> | chr1p32.1 | 0.04677 | -                 |        |             |         |          |            |            |       |         |            |              |      |
| <b>Arnt</b>      | 1q21.3    | 0.04896 | -                 |        |             |         |          |            |            |       |         |            |              |      |
| <b>Ahr</b>       | 7p21.1    | 0.04896 | -                 |        |             |         |          |            |            |       |         |            |              |      |
| <b>Pax4</b>      | 7q32.1    | 0.05596 | -                 |        |             |         |          |            |            |       |         |            |              |      |
| <b>Nr2e3</b>     | 15q23     | 0.06206 | -                 |        |             |         |          |            |            |       |         |            |              |      |
| <b>MEF2A</b>     | 15q26.3   | 0.06565 | -                 |        |             |         |          |            |            |       |         |            |              |      |
| <b>PPARG</b>     | 3p25.2    | 0.07117 | -                 |        |             |         |          |            |            |       |         |            |              |      |
| <b>RXRA</b>      | 9q34.2    | 0.07117 | -                 |        |             |         |          |            |            |       |         |            |              |      |
| <b>HNF4A</b>     | 20q13.12  | 0.07563 | -                 |        |             |         |          |            |            |       |         |            |              |      |
| <b>NFE2L1</b>    | 17q21.32  | 0.08202 | -                 |        |             |         |          |            |            |       |         |            |              |      |
| <b>MafG</b>      | 17q25.3   | 0.08202 | -                 |        |             |         |          |            |            |       |         |            |              |      |
| <b>Pdx1</b>      | 13q12.2   | 0.08274 | -                 |        |             |         |          |            |            |       |         |            |              |      |
| <b>HNF1A</b>     | 12q24.31  | 0.08293 | -                 |        |             |         |          |            |            |       |         |            |              |      |
| <b>Klf4</b>      | 9q31.2    | 0.08677 | ✓                 |        |             |         |          |            |            |       |         |            |              |      |
| <b>Prrx2</b>     | 9q34.11   | 0.08683 | -                 |        |             |         |          |            |            |       |         |            |              |      |

<sup>a</sup> Predicted cancer- susceptibility region
