# Supplementary material for: Prediction of Potential Cancer-Risk Regions Based on Transcriptome Data: Towards a Comprehensive View
Source: PubMed Central journal article supplement (PMC4010480; doi:10.1371/journal.pone.0096320), 2014-05-05
Supplement: pone.0096320.s013.pdf [file pone.0096320.s013.pdf]

**Table S7** Expression patterns of common predicted regulators for down-expressed RNAs in different cancers (cancer data of 11 microarray studies: breast, colorectal, endometrial, gastric, liver, lung, ovarian, pancreatic, prostate and testicular cancers as well as glioblastoma). From total 13 common regulators predicted for down-expressed mRNAs, 6 regulators are located on PCSRs.

| Gene symbol  | Region   | Pvalue | <sup>a</sup> PCSR | Breast | Endometrial | Ovarian | Prostate | Testicular | Colorectal | Liver | Gastric | Pancreatic | Glioblastoma | Lung |
|--------------|----------|--------|-------------------|--------|-------------|---------|----------|------------|------------|-------|---------|------------|--------------|------|
| <b>FOXD1</b> | 5q13.2   | 0.0008 | ✓                 |        |             |         |          |            |            |       |         |            |              |      |
| <b>PBX1</b>  | 1q23.3   | 0.0204 | -                 |        |             |         |          |            |            |       |         |            |              |      |
| <b>NFIL3</b> | 9q22.31  | 0.0211 | ✓                 |        |             |         |          |            |            |       |         |            |              |      |
| <b>TBP</b>   | 6q27     | 0.0307 | -                 |        |             |         |          |            |            |       |         |            |              |      |
| <b>Gfi1</b>  | 1p22.1   | 0.0419 | -                 |        |             |         |          |            |            |       |         |            |              |      |
| <b>FOXA1</b> | 14q21.1  | 0.0431 | ✓                 |        |             |         |          |            |            |       |         |            |              |      |
| <b>CEBPA</b> | 19q13.11 | 0.0595 | -                 |        |             |         |          |            |            |       |         |            |              |      |
| <b>FOXA2</b> | 20p11.21 | 0.0703 | ✓                 |        |             |         |          |            |            |       |         |            |              |      |
| <b>RORA</b>  | 15q22.2  | 0.0850 | ✓                 |        |             |         |          |            |            |       |         |            |              |      |
| <b>NR3C1</b> | 5q31.3   | 0.0866 | -                 |        |             |         |          |            |            |       |         |            |              |      |
| <b>GATA2</b> | 3q21.3   | 0.0903 | -                 |        |             |         |          |            |            |       |         |            |              |      |
| <b>MEF2A</b> | 15q26.3  | 0.0922 | -                 |        |             |         |          |            |            |       |         |            |              |      |
| <b>TEAD1</b> | 11p15.3  | 0.0995 | ✓                 |        |             |         |          |            |            |       |         |            |              |      |

<sup>a</sup>Predicted cancer- susceptibility region
