# Supplementary material for: Prediction of Potential Cancer-Risk Regions Based on Transcriptome Data: Towards a Comprehensive View
Source: PubMed Central journal article supplement (PMC4010480; doi:10.1371/journal.pone.0096320), 2014-05-05
Supplement: pone.0096320.s014.pdf [file pone.0096320.s014.pdf]

**Table S8** List of transcription factors (TFs) which were predicted in the putative promoter regions (-3kbp to +1kb) of altered microRNAs using JASPAR (with at least 99% relative profile score threshold). Only common TFs for group of these microRNAs are presented.

| MicroRNA       | Cancer cell type |    |    |    |    |    |    |    |    |    |    |    |    |    |    | location | miRNA Cluster | PCSR | Common predicted TFs for miRNAs on same locus    |
|----------------|------------------|----|----|----|----|----|----|----|----|----|----|----|----|----|----|----------|---------------|------|--------------------------------------------------|
|                | Br               | Ce | En | Ov | Pr | Te | Re | Co | Ga | Li | Pn | Gl | Ln | In | Bl |          |               |      |                                                  |
| hsa-mir-200c   |                  |    |    |    |    |    |    |    |    |    |    |    |    |    |    | 12p13.31 | 12p13.31      | ✓    | NFIC, ETS1, USF1, MZF1_1-4, AP1, NR4A2,          |
| hsa-mir-141    |                  |    |    |    |    |    |    |    |    |    |    |    |    |    |    | 12p13.31 |               | ✓    | GATA2, SOX10, FEV, SPI1, ZNF354C, SPIB           |
| hsa-mir-106a   |                  |    |    |    |    |    |    |    |    |    |    |    |    |    |    | Xq26.2   | Xq26.2        | ✓    | ETS1, FOXL1, GATA2, ZNF354C, YY1, SPI1,          |
| hsa-mir-20b    |                  |    |    |    |    |    |    |    |    |    |    |    |    |    |    | Xq26.2   |               | ✓    | GATA3, NFATC2, AP1, NFIC, USF1                   |
| hsa-mir-30c-2  |                  |    |    |    |    |    |    |    |    |    |    |    |    |    |    | 6q13     | 6q13          | ✓    | NFIC, ETS1, MZF1_1-4, SOX10                      |
| hsa-mir-30a    |                  |    |    |    |    |    |    |    |    |    |    |    |    |    |    | 6q13     |               | ✓    | GATA2, ZNF354C, FOXD1                            |
| hsa-mir-500    |                  |    |    |    |    |    |    |    |    |    |    |    |    |    |    | Xp11.23  |               | -    | ETS1 , MZF1_1-4, GATA2 ,SOX10,                   |
| hsa-mir-532    |                  |    |    |    |    |    |    |    |    |    |    |    |    |    |    | Xp11.23  |               | -    | YY1 , ZNF354C , SPI1, GATA3                      |
| hsa-mir-501    |                  |    |    |    |    |    |    |    |    |    |    |    |    |    |    | Xp11.23  | Xp11.23       | -    |                                                  |
| hsa-mir-502    |                  |    |    |    |    |    |    |    |    |    |    |    |    |    |    | Xp11.23  |               | -    |                                                  |
| hsa-mir-362    |                  |    |    |    |    |    |    |    |    |    |    |    |    |    |    | Xp11.23  |               | -    |                                                  |
| hsa-mir-432    |                  |    |    |    |    |    |    |    |    |    |    |    |    |    |    | 14q32.2  |               | ✓    | YY1, ETS1, MZF1_1-4, SPIB, ZNF354C, GATA3, SOX10 |
| hsa-mir-770    |                  |    |    |    |    |    |    |    |    |    |    |    |    |    |    | 14q32.2  | 14q32.2       | ✓    |                                                  |
| hsa-mir-127    |                  |    |    |    |    |    |    |    |    |    |    |    |    |    |    | 14q32.2  |               | ✓    |                                                  |
| hsa-mir-379    |                  |    |    |    |    |    |    |    |    |    |    |    |    |    |    | 14q32.31 |               | -    | NFIC, ETS1, YY1, MZF1_1-4 , GATA2,               |
| hsa-mir-382    |                  |    |    |    |    |    |    |    |    |    |    |    |    |    |    | 14q32.31 | 14q32.31      | -    | GATA3, ZNF354C , NFATC2, SPI1                    |
| hsa-mir-134    |                  |    |    |    |    |    |    |    |    |    |    |    |    |    |    | 14q32.31 |               | -    |                                                  |
| hsa-mir-27b    |                  |    |    |    |    |    |    |    |    |    |    |    |    |    |    | 9q22.32  |               | -    | YY1, GATA2, ETS1, NFIC, SPI1                     |
| hsa-let-7d     |                  |    |    |    |    |    |    |    |    |    |    |    |    |    |    | 9q22.32  | 9q22.32       | -    | MZF1_1-4 , ZNF354C                               |
| hsa-mir-23b    |                  |    |    |    |    |    |    |    |    |    |    |    |    |    |    | 9q22.32  |               | -    |                                                  |
| hsa-mir-99b    |                  |    |    |    |    |    |    |    |    |    |    |    |    |    |    | 19q13.41 | 19q13.41      | ✓    | ZNF354C, SPIB, MZF1_1-4, SP1, NR4A2, TFAP2A      |
| hsa-mir-125a   |                  |    |    |    |    |    |    |    |    |    |    |    |    |    |    | 19q13.41 |               | ✓    | ETS1, SPI1, ELK1, NFIC, YY1                      |
| hsa-mir-424    |                  |    |    |    |    |    |    |    |    |    |    |    |    |    |    | Xq26.3   | -             | -    | -                                                |
| hsa-mir-106b   |                  |    |    |    |    |    |    |    |    |    |    |    |    |    |    | 7q22.1   | 7q22.1        | -    | MZF1_1-4 , YY1, GATA2, ZNF354C, NFATC2, HOXA5,   |
| hsa-mir-93     |                  |    |    |    |    |    |    |    |    |    |    |    |    |    |    | 7q22.1   |               | -    | ETS1,FOXO3, GATA3, FEV, SPI1, NFIC               |
| hsa-mir-149    |                  |    |    |    |    |    |    |    |    |    |    |    |    |    |    | 2q37.3   | -             | -    | -                                                |
| hsa-mir-200b   |                  |    |    |    |    |    |    |    |    |    |    |    |    |    |    | 1p36.33  | -             | -    | -                                                |
| hsa-mir-21     |                  |    |    |    |    |    |    |    |    |    |    |    |    |    |    | 17q23.1  | -             | ✓    | -                                                |
| hsa-mir-126    |                  |    |    |    |    |    |    |    |    |    |    |    |    |    |    | 9q34.3   | -             | -    | -                                                |
| hsa-mir-214    |                  |    |    |    |    |    |    |    |    |    |    |    |    |    |    | 1q24.3   | -             | ✓    | -                                                |
| hsa-mir-101-1  |                  |    |    |    |    |    |    |    |    |    |    |    |    |    |    | 1p31.3   | -             | ✓    | -                                                |
| hsa-miR-182    |                  |    |    |    |    |    |    |    |    |    |    |    |    |    |    | 7q32.2   | -             | -    | -                                                |
| mir155HG (BIC) |                  |    |    |    |    |    |    |    |    |    |    |    |    |    |    | 21q21.3  | -             | ✓    | -                                                |
| hsa-mir-30e    |                  |    |    |    |    |    |    |    |    |    |    |    |    |    |    | 1p34.2   | -             | -    | -                                                |
| hsa-mir-422a   |                  |    |    |    |    |    |    |    |    |    |    |    |    |    |    | 15q22.31 | -             | -    | -                                                |
| hsa-mir-132    |                  |    |    |    |    |    |    |    |    |    |    |    |    |    |    | 17p13.3  | -             | -    | -                                                |
| hsa-mir-205    |                  |    |    |    |    |    |    |    |    |    |    |    |    |    |    | 1q32.2   | -             | -    | -                                                |
| hsa-mir-375    |                  |    |    |    |    |    |    |    |    |    |    |    |    |    |    | 2q35     | -             | -    | -                                                |
| hsa-mir-1274b  |                  |    |    |    |    |    |    |    |    |    |    |    |    |    |    | 19q13.43 | -             | -    | -                                                |
| hsa-mir-361    |                  |    |    |    |    |    |    |    |    |    |    |    |    |    |    | Xq21.2   | -             | -    | -                                                |

Abbreviations: Br, Breast; Ce, Cervical; En, Endometrial; Ov, Ovarian; Pr, Prostate; Te, Testicular; Re, Renal; Co, Colorectal; Ga, Gastric; Li, Liver; Pn, Pancreatic; Gl, Glioblastoma; Ln, Lung; In, Intestinal Neuroendocrine; Bl, Bladder; PCSR, Potential Cancer-Susceptibility Region; TF, Transcription Factor.

Symbols: , over-expression; , down-expression; ✓, risk region
