# Supplementary material for: Prediction of Potential Cancer-Risk Regions Based on Transcriptome Data: Towards a Comprehensive View
Source: PubMed Central journal article supplement (PMC4010480; doi:10.1371/journal.pone.0096320), 2014-05-05
Supplement: pone.0096320.s016.pdf [file pone.0096320.s016.pdf]

**Table S10** Details of raw CEL (microarray chip) expression data (obtained from GEO database) have been used in present study. This data are obtained from studies on breast, colorectal, endometrial, gastric, liver, lung, ovarian, pancreatic, prostate, testicular, bladder, intestine neuroendocrine, cervical and renal cancers as well as glioblastoma

|                                         | Accession numbers | Cancer name                     | Study                                         |
|-----------------------------------------|-------------------|---------------------------------|-----------------------------------------------|
| <sup>a</sup> Transcript microarray data | GSE17025          | Endometrial cancer              | Day <i>et al.</i> , 2011 <sup>1</sup>         |
|                                         | GSE26910          | Breast and prostate cancer      | Planche <i>et al.</i> , 2011 <sup>2</sup>     |
|                                         | GSE18520          | Ovarian cancer                  | Mok <i>et al.</i> , 2009 <sup>3</sup>         |
|                                         | GSE15220          | Testicular cancer               | Cheung <i>et al.</i> , 2010 <sup>4</sup>      |
|                                         | GSE29721          | Liver cancer                    | Stefanska <i>et al.</i> , 2011 <sup>5</sup>   |
|                                         | GSE19826          | Gastric cancer                  | Wang <i>et al.</i> , 2012 <sup>6</sup>        |
|                                         | GSE22780          | Pancreatic adenocarcinoma       | Balasenthil <i>et al.</i> , 2010 <sup>7</sup> |
|                                         | GSE23878          | Colorectal cancer               | Uddin <i>et al.</i> , 2011 <sup>8</sup>       |
|                                         | GSE15824          | Glioblastoma                    | Grzmil <i>et al.</i> , 2011 <sup>9</sup>      |
|                                         | GSE18842          | Lung adenocarcinoma             | Landi <i>et al.</i> , 2008 <sup>10</sup>      |
| <sup>a</sup> MicroRNA microarray data   | GSE23383          | Ovarian cancer                  | Shahab <i>et al.</i> , 2011 <sup>11</sup>     |
|                                         | GSE23022          | Prostate carcinoma              | Wach <i>et al.</i> , 2012 <sup>12</sup>       |
|                                         | GSE39015          | Cervical cancer                 | Hall <i>et al.</i> , 2012 <sup>13</sup>       |
|                                         | GSE41282          | Renal cancer                    | Wach <i>et al.</i> , 2012                     |
|                                         | GSE39093          | Bladder tumor                   | Xu <i>et al.</i> , 2013 <sup>14</sup>         |
|                                         | GSE33568          | Intestinal neuroendocrine tumor | Li <i>et al.</i> , 2013 <sup>15</sup>         |

<sup>a</sup>We analyzed total of cancerous cel files vs. total of normal s in each study

- 1 Day, R. *et al.* Identifier mapping performance for integrating transcriptomics and proteomics experimental results. *BMC Bioinformatics* **12**, 213 (2011).
- 2 Planche, A. *et al.* Identification of Prognostic Molecular Features in the Reactive Stroma of Human Breast and Prostate Cancer. *PLoS One* **6**, e18640, doi:10.1371/journal.pone.0018640 (2011).
- 3 Mok, S. C. *et al.* A Gene Signature Predictive for Outcome in Advanced Ovarian Cancer Identifies a Survival Factor: Microfibril-Associated Glycoprotein 2. *Cancer Cell* **16**, 521-532, doi:10.1016/j.ccr.2009.10.018 (2009).
- 4 Cheung, H. H. *et al.* Genome-wide DNA methylation profiling reveals novel epigenetically regulated genes and non-coding RNAs in human testicular cancer. *Br J Cancer* **102**, 419-427, doi:<http://www.nature.com/bjc/journal/v102/n2/supinfo/6605505s1.html> (2010).
- 5 Stefanska, B. *et al.* Definition of the Landscape of Promoter DNA Hypomethylation in Liver Cancer. *Cancer Research* **71**, 5891-5903, doi:10.1158/0008-5472.can-10-3823 (2011).
- 6 Wang, Q. *et al.* Upregulated INHBA expression is associated with poor survival in gastric cancer. *Medical Oncology* **29**, 77-83, doi:10.1007/s12032-010-9766-y (2012).
- 7 Balasenthil, S. *et al.* A Migration Signature and Plasma Biomarker Panel for Pancreatic Adenocarcinoma. *Cancer Prevention Research* **4**, 137-149, doi:10.1158/1940-6207.capr-10-0025 (2011).
- 8 Uddin, S. *et al.* Genome-Wide Expression Analysis of Middle Eastern Colorectal Cancer Reveals FOXM1 as a Novel Target for Cancer Therapy. *The American journal of pathology* **178**, 537-547 (2011).
- 9 Grzmil, M. *et al.* MAP Kinase-Interacting Kinase 1 Regulates SMAD2-Dependent TGF- $\beta$  Signaling Pathway in Human Glioblastoma. *Cancer Research* **71**, 2392-2402, doi:10.1158/0008-5472.can-10-3112 (2011).
- 10 Landi, M. T. *et al.* Gene Expression Signature of Cigarette Smoking and Its Role in Lung Adenocarcinoma Development and Survival. *PLoS One* **3**, e1651, doi:10.1371/journal.pone.0001651 (2008).
- 11 Shahab, S. W. *et al.* Evidence for the Complexity of MicroRNA-Mediated Regulation in Ovarian Cancer: A Systems Approach. *PLoS One* **6**, e22508, doi:10.1371/journal.pone.0022508 (2011).
- 12 Wach, S. *et al.* MicroRNA profiles of prostate carcinoma detected by multiplatform microRNA screening. *International Journal of Cancer* **130**, 611-621, doi:10.1002/ijc.26064 (2012).
- 13 Hall, J. S. *et al.* Enhanced stability of microRNA expression facilitates classification of FFPE tumour samples exhibiting near total mRNA degradation. *Br J Cancer* **107**, 684-694, doi:<http://www.nature.com/bjc/journal/v107/n4/supinfo/bjc2012294s1.html> (2012).
- 14 Xu, C. *et al.* miRNA-100 Inhibits Human Bladder Urothelial Carcinogenesis by Directly Targeting mTOR. *Molecular cancer therapeutics* **12**, 207-219 (2013).
- 15 Li, S.-C. *et al.* Global microRNA profiling of well-differentiated small intestinal neuroendocrine tumors. *Mod Pathol*, doi:<http://www.nature.com/modpathol/journal/vaop/ncurrent/supinfo/modpathol2012216s1.html> (2013).
