# Supplementary material for: Prediction of Potential Cancer-Risk Regions Based on Transcriptome Data: Towards a Comprehensive View
Source: PLoS One. 2014 May 5;9(5):e96320. doi: 10.1371/journal.pone.0096320 (PMC4010480; doi:10.1371/journal.pone.0096320)
Supplement: Table S15 — Percentage of region participation for total differentially expressed probsets (first 200 probsets with highest fold changes) during total 11 Cancers. (XLSX) [file pone.0096320.s021.xlsx]

## Sheet: Table S15
Table S15 Percentage of region participation for total differentially expressed probsets (first 200 probsets with highest fold changes) during total 11 Cancers.
Chromosome Region	Frequency of total probsets (FTR)	Frequency of over-expressed probsets (FOR) (Summation of 11 cancers)	Percentage of region participation for over expressed probsets(%)	Frequency of down-expressed probsets (FDR) (Summation of 11 cancers)	Percentage of region participation for down expressed probsets(%)
chr1: p11.2	12	5	3.78788	0	0
chr1: p12	48	3	0.568182	4	0.757576
chr1: p13.1	35	1	0.25974	1	0.25974
chr1: p13.2	137	2	0.132714	8	0.530856
chr1: p13.3	144	7	0.441919	5	0.315657
chr1: p21.1	19	13	6.2201	2	0.956938
chr1: p22.1	78	3	0.34965	1	0.1443
chr1: p22.2	53	2	0.343053	1	0.189394
chr1: p22.3	73	10	1.24533	2	0.2331
chr1: p31.1	151	4	0.240819	2	0.343053
chr1: p31.2	2	2	9.09091	9	1.1208
chr1: p31.3	151	11	0.662252	10	0.602047
chr1: p32.1	24	3	1.13636	10	0.602047
chr1: p32.2	31	2	0.58651	1	0.378788
chr1: p32.3	151	8	0.481638	3	0.879765
chr1: p34.1	102	6	0.534759	2	0.120409
chr1: p34.2	128	7	0.497159	5	0.614251
chr1: p34.3	169	4	0.215169	4	0.284091
chr1: p35.2	40	2	0.454545	2	0.195503
chr1: p36.11	183	8	0.397417	4	0.198708
chr1: p36.12	114	5	0.398724	5	0.398724
chr1: p36.13	147	2	0.123686	5	0.309215
chr1: p36.22	130	1	0.0699301	6	0.737101
chr1: p36.23	53	2	0.343053	1	0.0699301
chr1: p36.32	62	1	0.146628	2	0.293255
chr1: p36.33	189	2	0.0962001	3	0.208189
chr1: q21.1	131	1	0.0693963	2	0.1998
chr1: q21.2	91	5	0.4995	8	0.286328
chr1: q21.3	254	12	0.429492	3	0.320856
chr1: q22	116	17	1.33229	4	0.519481
chr1: q23.1	85	7	0.748663	13	0.787879
chr1: q23.2	70	2	0.25974	1	0.293255
chr1: q23.3	150	12	0.727273	7	0.684262
chr1: q24.1	31	1	0.293255	5	1.05708
chr1: q24.2	93	1	0.0977517	2	0.211416
chr1: q25.1	61	3	0.447094	2	0.171527
chr1: q25.3	106	3	0.25729	5	2.1645
chr1: q31.1	21	1	0.4329	1	0.284091
chr1: q31.2	32	4	1.13636	5	1.10865
chr1: q31.3	41	10	2.21729	16	0.542741
chr1: q32.1	268	32	1.08548	5	0.505051
chr1: q32.2	90	5	0.505051	4	0.512164
chr1: q32.3	71	11	1.40845	9	0.743802
chr1: q41	110	7	0.578512	2	0.2457
chr1: q42.12	54	2	0.3367	3	0.478469
chr1: q42.2	74	6	0.737101	7	0.815851
chr1: q44	112	6	0.487013	2	0.162338
chr2: p11.2	153	7	0.415924	15	0.891266
chr2: p12	44	3	0.619835	8	1.65289
chr2: p13.1	80	3	0.340909	2	0.227273
chr2: p13.3	97	2	0.187441	5	0.468604
chr2: p14	81	0	0	1	0.112233
chr2: p16.1	78	1	0.11655	6	0.699301
chr2: p16.2	33	0	0	1	0.275482
chr2: p21	152	4	0.239234	6	0.358852
chr2: p22.1	56	1	0.162338	1	0.162338
chr2: p22.2	64	4	0.568182	2	0.284091
chr2: p23.1	22	2	0.826446	4	1.65289
chr2: p23.3	151	6	0.361228	2	0.120409
chr2: p24.1	52	5	0.874126	2	0.34965
chr2: p24.2	15	2	1.21212	0	0
chr2: p24.3	29	2	0.626959	0	0
chr2: p25.1	89	9	0.919305	0	0
chr2: p25.2	20	5	2.27273	3	1.36364
chr2: p25.3	47	0	0	4	0.773694
chr2: q11.1	41	3	0.665188	3	0.665188
chr2: q11.2	168	0	0	3	0.162338
chr2: q12.2	15	1	0.606061	2	1.21212
chr2: q12.3	28	5	1.62338	1	0.324675
chr2: q13	123	13	0.960828	7	0.517369
chr2: q14.1	29	0	0	2	0.626959
chr2: q14.2	53	1	0.171527	6	1.02916
chr2: q14.3	70	1	0.12987	0	0
chr2: q21.2	23	1	0.395257	0	0
chr2: q22.1	22	0	0	2	0.826446
chr2: q22.2	6	1	1.51515	0	0
chr2: q23.1	16	1	0.568182	0	0
chr2: q23.3	55	0	0	2	0.330579
chr2: q24.1	43	2	0.422833	2	0.422833
chr2: q24.2	64	4	0.568182	6	0.852273
chr2: q24.3	54	4	0.673401	6	1.0101
chr2: q31.1	173	11	0.578035	9	0.472937
chr2: q31.2	65	0	0	7	0.979021
chr2: q31.3	27	0	0	2	0.673401
chr2: q32.1	60	2	0.30303	7	1.06061
chr2: q32.2	57	9	1.43541	7	1.11643
chr2: q32.3	32	0	0	4	1.13636
chr2: q33.1	153	3	0.178253	3	0.178253
chr2: q34	54	2	0.3367	3	0.505051
chr2: q35	175	12	0.623377	9	0.467532
chr2: q36.1	55	4	0.661157	0	0
chr2: q36.3	58	3	0.470219	3	0.470219
chr2: q37.1	124	8	0.58651	4	0.293255
chr2: q37.2	15	0	0	1	0.606061
chr2: q37.3	187	1	0.0486145	3	0.145843
chr3: p12.1	15	0	0	3	1.81818
chr3: p12.3	22	2	0.826446	4	1.65289
chr3: p13	70	4	0.519481	1	0.12987
chr3: p14.1	79	1	0.115075	4	0.460299
chr3: p14.2	34	0	0	2	0.534759
chr3: p14.3	68	5	0.668449	5	0.668449
chr3: p21.1	95	1	0.0956938	4	0.382775
chr3: p21.31	278	13	0.425114	7	0.228908
chr3: p22.1	90	0	0	4	0.40404
chr3: p22.2	76	2	0.239234	3	0.358852
chr3: p22.3	55	2	0.330579	1	0.165289
chr3: p24.1	42	2	0.4329	3	0.649351
chr3: p24.2	28	1	0.324675	0	0
chr3: p24.3	53	0	0	2	0.343053
chr3: p25.1	90	2	0.20202	0	0
chr3: p25.2	33	3	0.826446	1	0.275482
chr3: p25.3	120	1	0.0757576	2	0.151515
chr3: p26.1	46	0	0	1	0.197628
chr3: p26.2	20	1	0.454545	1	0.454545
chr3: q11.1	7	0	0	1	1.2987
chr3: q12.1	24	5	1.89394	1	0.378788
chr3: q12.2	15	1	0.606061	6	3.63636
chr3: q13.13	36	2	0.505051	1	0.252525
chr3: q13.2	66	0	0	6	0.826446
chr3: q13.31	49	1	0.185529	1	0.185529
chr3: q13.33	81	1	0.112233	1	0.112233
chr3: q21.1	55	2	0.330579	0	0
chr3: q21.2	44	2	0.413223	0	0
chr3: q21.3	103	3	0.264784	0	0
chr3: q22.1	101	3	0.270027	5	0.450045
chr3: q22.2	28	0	0	2	0.649351
chr3: q22.3	58	2	0.31348	8	1.25392
chr3: q23	86	1	0.105708	7	0.739958
chr3: q24	55	7	1.15702	2	0.330579
chr3: q25.1	78	3	0.34965	9	1.04895
chr3: q25.2	23	0	0	4	1.58103
chr3: q25.31	45	0	0	2	0.40404
chr3: q25.32	34	3	0.802139	4	1.06952
chr3: q25.33	29	4	1.25392	4	1.25392
chr3: q26.1	28	2	0.649351	7	2.27273
chr3: q26.2	74	7	0.859951	2	0.2457
chr3: q26.31	48	4	0.757576	1	0.189394
chr3: q26.33	60	3	0.454545	1	0.151515
chr3: q27.1	70	4	0.519481	0	0
chr3: q27.2	44	1	0.206612	0	0
chr3: q27.3	45	4	0.808081	4	0.808081
chr3: q28	44	8	1.65289	1	0.206612
chr3: q29	199	6	0.274098	3	0.137049
chr4: p11	25	0	0	2	0.727273
chr4: p12	36	2	0.505051	0	0
chr4: p13	38	3	0.717703	3	0.717703
chr4: p14	109	2	0.166806	1	0.0834028
chr4: p15.1	10	4	3.63636	1	0.909091
chr4: p15.2	52	2	0.34965	4	0.699301
chr4: p15.31	23	4	1.58103	0	0
chr4: p15.32	54	1	0.16835	0	0
chr4: p15.33	27	2	0.673401	0	0
chr4: p16.1	90	3	0.30303	1	0.10101
chr4: p16.2	16	1	0.568182	0	0
chr4: p16.3	179	3	0.152362	2	0.101574
chr4: q12	113	6	0.482703	3	0.241352
chr4: q13.1	17	0	0	1	0.534759
chr4: q13.2	39	2	0.4662	7	1.6317
chr4: q13.3	103	11	0.970874	28	2.47132
chr4: q21.1	74	5	0.614251	4	0.4914
chr4: q21.21	43	4	0.845666	3	0.634249
chr4: q21.22	45	1	0.20202	2	0.40404
chr4: q21.23	39	3	0.699301	0	0
chr4: q22.1	72	7	0.883838	4	0.505051
chr4: q22.3	26	8	2.7972	1	0.34965
chr4: q23	52	0	0	15	2.62238
chr4: q24	69	0	0	9	1.18577
chr4: q25	75	6	0.727273	12	1.45455
chr4: q26	72	4	0.505051	7	0.883838
chr4: q27	40	1	0.227273	9	2.04545
chr4: q28.3	21	3	1.2987	3	1.2987
chr4: q31.1	48	1	0.189394	2	0.378788
chr4: q31.21	81	0	0	7	0.785634
chr4: q31.23	11	0	0	1	0.826446
chr4: q31.3	76	9	1.07656	3	0.358852
chr4: q32.1	72	9	1.13636	3	0.378788
chr4: q32.2	11	0	0	2	1.65289
chr4: q32.3	46	5	0.988142	5	0.988142
chr4: q33	23	0	0	2	0.790514
chr4: q34.1	51	4	0.713012	19	3.38681
chr4: q34.2	12	0	0	10	7.57576
chr4: q34.3	12	0	0	2	1.51515
chr4: q35.1	89	2	0.20429	7	0.715015
chr4: q35.2	31	0	0	2	0.58651
chr5: p12	48	1	0.189394	0	0
chr5: p13.1	69	2	0.263505	23	3.0303
chr5: p13.2	83	3	0.328587	1	0.109529
chr5: p13.3	50	3	0.545455	2	0.363636
chr5: p14.2	5	0	0	1	1.81818
chr5: p15.1	32	0	0	3	0.852273
chr5: p15.2	66	0	0	3	0.413223
chr5: p15.31	40	2	0.454545	1	0.227273
chr5: p15.33	62	5	0.733138	3	0.439883
chr5: q11.2	101	5	0.450045	2	0.180018
chr5: q12.1	47	5	0.967118	2	0.386847
chr5: q12.3	66	2	0.275482	1	0.137741
chr5: q13.2	118	6	0.46225	0	0
chr5: q13.3	61	10	1.49031	5	0.745156
chr5: q14.1	95	3	0.287081	4	0.382775
chr5: q14.2	12	2	1.51515	0	0
chr5: q14.3	72	5	0.631313	5	0.631313
chr5: q22.1	24	0	0	3	1.13636
chr5: q22.2	29	0	0	1	0.31348
chr5: q22.3	23	0	0	2	0.790514
chr5: q23.1	43	2	0.422833	2	0.422833
chr5: q23.2	61	4	0.596125	4	0.596125
chr5: q23.3	25	1	0.363636	1	0.363636
chr5: q31.1	190	9	0.430622	6	0.287081
chr5: q31.2	102	12	1.06952	6	0.534759
chr5: q31.3	162	1	0.0561167	0	0
chr5: q32	106	3	0.25729	7	0.600343
chr5: q33.1	61	2	0.298063	4	0.596125
chr5: q33.2	39	4	0.932401	0	0
chr5: q33.3	81	3	0.3367	6	0.673401
chr5: q34	56	5	0.811688	0	0
chr5: q35.1	86	4	0.422833	4	0.422833
chr5: q35.2	82	2	0.221729	3	0.332594
chr5: q35.3	174	2	0.104493	4	0.208986
chr6: p12.1	67	3	0.407056	4	0.542741
chr6: p12.2	26	0	0	1	0.34965
chr6: p12.3	63	2	0.2886	3	0.4329
chr6: p21.1	223	6	0.244598	10	0.407664
chr6: p21.31	111	3	0.2457	3	0.2457
chr6: p21.32	106	18	1.54374	2	0.171527
chr6: p21.33	175	8	0.415584	10	0.519481
chr6: p22.1	183	2	0.0993542	0	0
chr6: p22.2	110	4	0.330579	1	0.0826446
chr6: p22.3	132	10	0.688705	9	0.619835
chr6: p24.1	21	0	0	4	1.7316
chr6: p24.3	59	4	0.616333	1	0.154083
chr6: p25.1	32	1	0.284091	1	0.284091
chr6: p25.2	62	2	0.293255	0	0
chr6: p25.3	32	4	1.13636	2	0.568182
chr6: q12	26	0	0	3	1.04895
chr6: q13	63	10	1.443	5	0.721501
chr6: q14.1	65	5	0.699301	0	0
chr6: q14.2	15	0	0	4	2.42424
chr6: q14.3	30	1	0.30303	4	1.21212
chr6: q15	81	1	0.112233	1	0.112233
chr6: q16.1	31	0	0	6	1.75953
chr6: q21	179	5	0.253936	3	0.152362
chr6: q22.1	55	11	1.81818	3	0.495868
chr6: q22.31	52	4	0.699301	11	1.92308
chr6: q22.32	11	1	0.826446	0	0
chr6: q22.33	38	2	0.478469	5	1.19617
chr6: q23.1	13	0	0	1	0.699301
chr6: q23.2	67	0	0	6	0.814111
chr6: q23.3	77	5	0.590319	2	0.236128
chr6: q24.1	27	1	0.3367	0	0
chr6: q24.2	44	0	0	4	0.826446
chr6: q25.1	70	3	0.38961	3	0.38961
chr6: q25.2	35	1	0.25974	3	0.779221
chr6: q25.3	111	8	0.655201	5	0.4095
chr6: q26	40	1	0.227273	1	0.227273
chr6: q27	121	10	0.751315	2	0.150263
chr7: p11.2	52	2	0.34965	5	0.874126
chr7: p12.1	21	1	0.4329	0	0
chr7: p12.3	38	3	0.717703	0	0
chr7: p13	106	1	0.0857633	0	0
chr7: p14.1	61	19	2.83159	6	0.894188
chr7: p14.2	34	8	2.13904	0	0
chr7: p14.3	135	5	0.3367	7	0.47138
chr7: p15.1	5	0	0	1	1.81818
chr7: p15.2	82	13	1.44124	0	0
chr7: p15.3	72	10	1.26263	5	0.631313
chr7: p21.1	59	11	1.69492	5	0.770416
chr7: p21.2	16	0	0	2	1.13636
chr7: p21.3	51	1	0.178253	5	0.891266
chr7: p22.3	97	0	0	1	0.0937207
chr7: q11.21	78	1	0.11655	0	0
chr7: q11.23	166	6	0.328587	5	0.273823
chr7: q21.11	49	0	0	14	2.5974
chr7: q21.12	41	1	0.221729	3	0.665188
chr7: q21.2	44	0	0	1	0.206612
chr7: q21.13	24	2	0.757576	0	0
chr7: q21.3	88	9	0.929752	16	1.65289
chr7: q22.1	269	6	0.202771	9	0.304157
chr7: q22.3	74	3	0.36855	2	0.2457
chr7: q31.1	78	1	0.11655	4	0.4662
chr7: q31.2	40	2	0.454545	9	2.04545
chr7: q31.31	21	2	0.865801	1	0.4329
chr7: q31.32	28	0	0	1	0.324675
chr7: q31.33	21	0	0	1	0.4329
chr7: q31.32	28	2	0.649351	0	0
chr7: q32.1	57	2	0.318979	0	0
chr7: q32.2	50	1	0.181818	3	0.545455
chr7: q33	78	1	0.11655	2	0.2331
chr7: q34	169	3	0.161377	5	0.268962
chr7: q35	38	3	0.717703	0	0
chr7: q36.1	160	8	0.454545	0	0
chr7: q36.2	23	1	0.395257	0	0
chr8: p11.21	75	5	0.606061	10	1.21212
chr8: p11.22	27	0	0	1	0.3367
chr8: p12	70	2	0.25974	2	0.25974
chr8: p21.1	44	5	1.03306	10	2.06612
chr8: p21.2	80	5	0.568182	10	1.13636
chr8: p21.3	122	5	0.372578	9	0.670641
chr8: p22	68	3	0.40107	10	1.3369
chr8: p23.1	152	5	0.299043	3	0.179426
chr8: p23.3	47	0	0	1	0.193424
chr8: q11.21	34	1	0.26738	0	0
chr8: q11.23	39	2	0.4662	1	0.2331
chr8: q12.1	71	1	0.128041	4	0.512164
chr8: q13.1	41	0	0	1	0.221729
chr8: q13.2	28	13	4.22078	1	0.324675
chr8: q13.3	37	1	0.2457	0	0
chr8: q21.11	54	4	0.673401	10	1.6835
chr8: q21.13	50	12	2.18182	6	1.09091
chr8: q21.2	15	0	0	3	1.81818
chr8: q21.3	70	2	0.25974	3	0.38961
chr8: q22.1	82	10	1.10865	3	0.332594
chr8: q22.2	41	0	0	1	0.221729
chr8: q22.3	73	9	1.1208	0	0
chr8: q23.1	34	1	0.26738	2	0.534759
chr8: q23.2	10	1	0.909091	4	3.63636
chr8: q24.11	25	0	0	1	0.363636
chr8: q24.12	38	3	0.717703	4	0.956938
chr8: q24.13	76	9	1.07656	0	0
chr8: q24.21	49	1	0.185529	0	0
chr8: q24.22	52	7	1.22378	0	0
chr8: q24.3	225	13	0.525253	5	0.20202
chr9: p13.2	71	4	0.512164	0	0
chr9: p13.3	149	2	0.122026	6	0.366077
chr9: p21.2	33	0	0	3	0.826446
chr9: p21.3	50	4	0.727273	2	0.363636
chr9: p22.1	20	1	0.454545	1	0.454545
chr9: p22.2	11	0	0	1	0.826446
chr9: p22.3	50	0	0	1	0.181818
chr9: p24.1	60	0	0	5	0.757576
chr9: p24.2	31	1	0.293255	1	0.293255
chr9: q13	22	0	0	1	0.413223
chr9: q21.11	43	0	0	6	1.2685
chr9: q21.12	32	0	0	6	1.70455
chr9: q21.13	59	5	0.770416	6	0.924499
chr9: q21.2	24	4	1.51515	1	0.378788
chr9: q21.32	30	2	0.606061	0	0
chr9: q21.33	45	4	0.808081	1	0.20202
chr9: q22.2	20	4	1.81818	0	0
chr9: q22.31	62	4	0.58651	9	1.31965
chr9: q22.32	70	1	0.12987	4	0.519481
chr9: q22.33	85	4	0.427807	0	0
chr9: q31.1	73	1	0.124533	5	0.622665
chr9: q31.2	33	5	1.37741	3	0.826446
chr9: q31.3	73	2	0.249066	3	0.373599
chr9: q32	89	2	0.20429	2	0.20429
chr9: q33.1	42	4	0.865801	13	2.81385
chr9: q33.2	93	0	0	3	0.293255
chr9: q33.3	120	1	0.0757576	1	0.0757576
chr9: q34.11	165	2	0.110193	2	0.110193
chr9: q34.12	15	2	1.21212	0	0
chr9: q34.2	56	0	0	3	0.487013
chr9: q34.3	191	5	0.237982	5	0.237982
chr10: p11.21	30	1	0.30303	0	0
chr10: p11.22	47	1	0.193424	1	0.193424
chr10: p12.1	79	3	0.345224	0	0
chr10: p12.31	50	5	0.909091	0	0
chr10: p12.33	14	1	0.649351	1	0.649351
chr10: p13	87	3	0.31348	2	0.208986
chr10: p14	76	1	0.119617	4	0.478469
chr10: p15.1	73	3	0.373599	2	0.249066
chr10: p15.2	9	1	1.0101	0	0
chr10: q11.21	68	2	0.26738	3	0.40107
chr10: q11.22	53	0	0	2	0.343053
chr10: q11.23	63	2	0.2886	1	0.1443
chr10: q21.1	43	6	1.2685	6	1.2685
chr10: q21.2	39	11	2.5641	1	0.2331
chr10: q21.3	67	3	0.407056	3	0.407056
chr10: q22.1	108	5	0.420875	5	0.420875
chr10: q22.3	62	0	0	6	0.879765
chr10: q23.1	43	0	0	2	0.422833
chr10: q23.2	45	0	0	4	0.808081
chr10: q23.31	69	4	0.527009	5	0.658762
chr10: q23.32	26	1	0.34965	1	0.34965
chr10: q23.33	63	15	2.1645	8	1.1544
chr10: q24.1	85	3	0.320856	2	0.213904
chr10: q24.2	48	1	0.189394	1	0.189394
chr10: q24.31	52	4	0.699301	1	0.174825
chr10: q25.2	57	2	0.318979	2	0.318979
chr10: q25.3	62	2	0.293255	7	1.02639
chr10: q26.11	67	0	0	1	0.135685
chr10: q26.12	10	1	0.909091	0	0
chr10: q26.13	101	5	0.450045	1	0.090009
chr10: q26.2	42	9	1.94805	3	0.649351
chr10: q26.3	87	1	0.104493	0	0
chr11: p11.12	5	1	1.81818	0	0
chr11: p11.2	147	2	0.123686	0	0
chr11: p13	133	5	0.341763	2	0.136705
chr11: p14.1	46	1	0.197628	6	1.18577
chr11: p14.2	13	2	1.3986	2	1.3986
chr11: p14.3	16	0	0	1	0.568182
chr11: p15.1	118	2	0.154083	6	0.46225
chr11: p15.2	55	5	0.826446	3	0.495868
chr11: p15.3	41	2	0.443459	5	1.10865
chr11: p15.4	261	9	0.31348	21	0.731452
chr11: p15.5	154	3	0.177096	9	0.531287
chr11: q12.1	93	1	0.0977517	6	0.58651
chr11: q12.2	91	7	0.699301	7	0.699301
chr11: q12.3	99	4	0.367309	2	0.183655
chr11: q13.1	213	4	0.170721	3	0.128041
chr11: q13.2	145	2	0.125392	0	0
chr11: q13.3	54	3	0.505051	2	0.3367
chr11: q13.4	153	4	0.237671	4	0.237671
chr11: q13.5	54	1	0.16835	4	0.673401
chr11: q14.1	100	1	0.0909091	4	0.363636
chr11: q14.2	44	0	0	2	0.413223
chr11: q14.3	30	3	0.909091	2	0.606061
chr11: q21	93	2	0.195503	0	0
chr11: q22.1	23	1	0.395257	1	0.395257
chr11: q22.2	18	15	7.57576	1	0.505051
chr11: q22.3	95	4	0.382775	2	0.191388
chr11: q23.1	65	0	0	4	0.559441
chr11: q23.2	55	3	0.495868	14	2.31405
chr11: q23.3	227	16	0.640769	8	0.320384
chr11: q24.1	35	2	0.519481	4	1.03896
chr11: q24.2	112	1	0.0811688	7	0.568182
chr11: q24.3	83	1	0.109529	4	0.438116
chr11: q25	34	3	0.802139	2	0.534759
chr12: p11.21	56	1	0.162338	1	0.162338
chr12: p11.22	33	4	1.10193	0	0
chr12: p11.23	35	1	0.25974	0	0
chr12: p12.1	91	5	0.4995	0	0
chr12: p12.2	14	3	1.94805	7	0.699301
chr12: p12.3	65	1	0.13986	8	1.11888
chr12: p13.1	48	4	0.757576	5	0.94697
chr12: p13.2	103	2	0.176523	2	0.176523
chr12: p13.31	189	17	0.817701	7	0.3367
chr12: p13.32	47	4	0.773694	1	0.193424
chr12: p13.33	92	8	0.790514	0	0
chr12: q12	89	5	0.510725	4	0.40858
chr12: q13.11	68	6	0.802139	2	0.26738
chr12: q13.12	126	4	0.2886	3	0.21645
chr12: q13.13	172	13	0.687104	7	0.369979
chr12: q13.2	82	2	0.221729	3	0.332594
chr12: q13.3	101	2	0.180018	6	0.540054
chr12: q14.1	55	1	0.165289	4	0.661157
chr12: q14.2	32	0	0	2	0.568182
chr12: q14.3	51	4	0.713012	6	1.06952
chr12: q15	92	1	0.0988142	2	0.197628
chr12: q21.1	31	3	0.879765	4	1.17302
chr12: q21.2	70	3	0.38961	6	0.779221
chr12: q21.31	38	1	0.239234	0	0
chr12: q21.33	38	3	0.717703	10	2.39234
chr12: q22	75	4	0.484848	2	0.242424
chr12: q23.1	80	1	0.113636	3	0.340909
chr12: q23.2	45	3	0.606061	0	0
chr12: q23.3	108	3	0.252525	2	0.16835
chr12: q24.11	95	0	0	1	0.0956938
chr12: q24.21	31	0	0	3	0.879765
chr12: q24.13	62	1	0.146628	1	0.146628
chr12: q24.22	33	1	0.275482	0	0
chr12: q24.31	219	2	0.083022	4	0.166044
chr12: q24.33	100	2	0.181818	5	0.454545
chr13: q12.11	85	6	0.641711	1	0.106952
chr13: q12.12	39	0	0	2	0.4662
chr13: q12.13	37	1	0.2457	1	0.2457
chr13: q12.2	30	3	0.909091	0	0
chr13: q12.3	54	2	0.3367	0	0
chr13: q13.1	44	0	0	2	0.413223
chr13: q13.2	4	1	2.27273	0	0
chr13: q13.3	63	8	1.1544	14	2.0202
chr13: q14.11	107	3	0.254885	6	0.509771
chr13: q14.12	13	1	0.699301	0	0
chr13: q14.13	41	0	0	1	0.221729
chr13: q14.3	76	4	0.478469	1	0.119617
chr13: q21.1	8	1	1.13636	2	2.27273
chr13: q21.32	14	0	0	2	1.2987
chr13: q21.33	17	1	0.534759	0	0
chr13: q22.1	30	2	0.606061	0	0
chr13: q22.2	13	1	0.699301	0	0
chr13: q22.3	24	3	1.13636	7	2.65152
chr13: q31.1	38	0	0	2	0.478469
chr13: q31.2	7	1	1.2987	0	0
chr13: q32.1	70	3	0.38961	3	0.38961
chr13: q32.3	46	3	0.592885	0	0
chr13: q33.1	40	9	2.04545	0	0
chr13: q33.3	26	2	0.699301	0	0
chr13: q34	146	2	0.124533	2	0.124533
chr14: q11.2	236	22	0.847458	4	0.154083
chr14: q12	123	5	0.369549	6	0.443459
chr14: q13.3	18	0	0	1	0.505051
chr14: q21.1	42	1	0.21645	2	0.4329
chr14: q21.3	58	0	0	1	0.15674
chr14: q22.1	61	4	0.596125	1	0.149031
chr14: q22.2	20	4	1.81818	0	0
chr14: q22.3	61	4	0.596125	0	0
chr14: q23.1	81	8	0.897868	1	0.112233
chr14: q23.2	50	0	0	4	0.727273
chr14: q23.3	67	2	0.27137	0	0
chr14: q24.1	53	1	0.171527	3	0.51458
chr14: q24.2	90	0	0	4	0.40404
chr14: q24.3	172	1	0.0528541	8	0.422833
chr14: q31.1	35	5	1.2987	3	0.779221
chr14: q31.3	48	0	0	5	0.94697
chr14: q32.12	83	1	0.109529	2	0.219058
chr14: q32.13	47	2	0.386847	1	0.193424
chr14: q32.2	87	0	0	8	0.835946
chr14: q32.32	26	0	0	1	0.34965
chr14: q32.33	161	7	0.395257	2	0.112931
chr15: q12	20	4	1.81818	2	0.909091
chr15: q13.1	31	0	0	1	0.293255
chr15: q13.3	39	8	1.8648	4	0.932401
chr15: q14	104	0	0	5	0.437063
chr15: q15.1	135	15	1.0101	0	0
chr15: q15.3	51	2	0.356506	0	0
chr15: q21.1	102	5	0.445633	11	0.980392
chr15: q21.2	104	2	0.174825	1	0.0874126
chr15: q21.3	91	14	1.3986	4	0.3996
chr15: q22.2	98	11	1.02041	0	0
chr15: q22.31	110	6	0.495868	2	0.165289
chr15: q22.33	8	0	0	1	1.13636
chr15: q23	127	5	0.35791	1	0.071582
chr15: q24.1	88	2	0.206612	3	0.309917
chr15: q25.1	99	5	0.459137	1	0.0918274
chr15: q25.2	73	0	0	4	0.498132
chr15: q25.3	58	0	0	2	0.31348
chr15: q26.1	128	9	0.639205	1	0.0710227
chr15: q26.2	30	0	0	6	1.81818
chr15: q26.3	76	2	0.239234	3	0.358852
chr16: p11.2	274	5	0.165893	3	0.0995355
chr16: p12.1	57	1	0.15949	3	0.478469
chr16: p12.2	96	0	0	4	0.378788
chr16: p12.3	88	6	0.619835	11	1.13636
chr16: p13.11	53	2	0.343053	5	0.857633
chr16: p13.13	61	1	0.149031	1	0.149031
chr16: p13.2	40	0	0	1	0.227273
chr16: p13.3	408	7	0.155971	27	0.601604
chr16: q12.1	80	6	0.681818	0	0
chr16: q12.2	79	4	0.460299	13	1.49597
chr16: q13	28	0	0	3	0.974026
chr16: q21	97	11	1.03093	3	0.281162
chr16: q22.1	218	11	0.458716	4	0.166806
chr16: q22.2	60	3	0.454545	3	0.454545
chr16: q23.1	97	0	0	3	0.281162
chr16: q23.2	40	2	0.454545	3	0.681818
chr16: q23.3	28	0	0	1	0.324675
chr16: q24.1	73	1	0.124533	3	0.373599
chr16: q24.2	37	2	0.4914	0	0
chr16: q24.3	111	1	0.0819001	0	0
chr17: p11.2	216	5	0.210438	9	0.378788
chr17: p12	76	4	0.478469	2	0.239234
chr17: p13.1	214	3	0.127443	1	0.0424809
chr17: p13.2	150	1	0.0606061	5	0.30303
chr17: q11.2	214	3	0.127443	5	0.212404
chr17: q12	236	2	0.0770416	6	0.231125
chr17: q21.2	177	21	1.07858	3	0.154083
chr17: q21.31	246	3	0.110865	5	0.184775
chr17: q21.32	149	7	0.42709	1	0.0610128
chr17: q21.33	113	8	0.643604	4	0.321802
chr17: q22	135	8	0.538721	4	0.26936
chr17: q23.1	31	0	0	4	1.17302
chr17: q23.3	94	1	0.0967118	1	0.0967118
chr17: q24.1	25	1	0.363636	0	0
chr17: q24.2	77	1	0.118064	11	1.2987
chr17: q24.3	26	5	1.74825	2	0.699301
chr17: q25.1	195	3	0.13986	3	0.13986
chr17: q25.3	298	8	0.244051	2	0.0610128
chr18: p11.21	85	0	0	1	0.106952
chr18: p11.22	51	4	0.713012	0	0
chr18: p11.31	66	0	0	8	1.10193
chr18: p11.32	51	5	0.891266	0	0
chr18: q11.2	99	7	0.642792	18	1.65289
chr18: q12.1	75	8	0.969697	6	0.727273
chr18: q12.2	77	1	0.118064	0	0
chr18: q12.3	39	0	0	1	0.2331
chr18: q21.1	83	2	0.219058	0	0
chr18: q21.2	60	1	0.151515	4	0.606061
chr18: q21.31	39	3	0.699301	3	0.699301
chr18: q21.32	26	1	0.34965	0	0
chr18: q21.33	52	7	1.22378	1	0.174825
chr18: q22.1	18	1	0.505051	1	0.505051
chr18: q22.3	53	0	0	2	0.343053
chr18: q23	73	4	0.498132	0	0
chr19: p12	80	5	0.568182	1	0.113636
chr19: p13.11	238	9	0.343774	0	0
chr19: p13.12	128	3	0.213068	2	0.142045
chr19: p13.2	378	4	0.0962001	11	0.26455
chr19: p13.3	462	6	0.118064	9	0.177096
chr19: q12	31	1	0.293255	3	0.879765
chr19: q13.11	79	2	0.23015	1	0.115075
chr19: q13.12	171	3	0.15949	3	0.15949
chr19: q13.2	263	12	0.414794	19	0.656758
chr19: q13.31	99	2	0.183655	1	0.0918274
chr19: q13.32	182	9	0.44955	5	0.24975
chr19: q13.33	230	9	0.355731	3	0.118577
chr19: q13.41	119	5	0.381971	1	0.0763942
chr19: q13.42	178	2	0.102145	2	0.102145
chr19: q13.43	181	2	0.100452	3	0.150678
chr20: p11.21	69	7	0.922266	2	0.263505
chr20: p11.23	84	0	0	2	0.21645
chr20: p12.1	62	3	0.439883	3	0.439883
chr20: p12.2	38	2	0.478469	0	0
chr20: p12.3	65	5	0.699301	4	0.559441
chr20: p13	199	4	0.182732	1	0.045683
chr20: q11.21	103	7	0.617829	1	0.0865801
chr20: q11.23	116	9	0.705329	3	0.23511
chr20: q12	33	2	0.550964	0	0
chr20: q13.12	193	11	0.518135	1	0.0471032
chr20: q13.13	84	2	0.21645	2	0.21645
chr20: q13.2	51	12	2.13904	1	0.178253
chr20: q13.31	31	7	2.05279	2	0.58651
chr20: q13.32	66	1	0.137741	0	0
chr20: q13.33	188	2	0.0967118	2	0.0967118
chr21: p11.1	6	1	1.51515	0	0
chr21: p11.2	9	1	1.0101	0	0
chr21: q11.2	17	1	0.534759	0	0
chr21: q21.1	47	1	0.193424	1	0.193424
chr21: q21.3	63	0	0	7	1.0101
chr21: q22.11	133	0	0	3	0.205058
chr21: q22.12	42	4	0.865801	2	0.4329
chr21: q22.13	50	2	0.363636	7	1.27273
chr21: q22.2	46	1	0.197628	0	0
chr21: q22.3	265	13	0.445969	5	0.171527
chr22: q11.21	192	0	0	2	0.094697
chr22: q11.22	79	0	0	4	0.460299
chr22: q11.23	92	2	0.197628	1	0.0988142
chr22: q12.1	74	2	0.2457	4	0.4914
chr22: q12.2	149	2	0.122026	0	0
chr22: q12.3	108	1	0.0841751	0	0
chr22: q13.1	182	1	0.04995	5	0.24975
chr22: q13.2	141	0	0	1	0.0644745
chr22: q13.31	117	1	0.0777001	1	0.0777001
chr22: q13.32	6	1	1.51515	0	0
chr22: q13.33	81	0	0	2	0.224467
chrX: p11.21	44	0	0	1	0.206612
chrX: p11.23	143	3	0.190718	1	0.0635728
chrX: p11.4	55	2	0.330579	5	0.826446
chrX: p21.3	16	0	0	1	0.568182
chrX: p21.1	18	3	1.51515	1	0.227273
chrX: p22.12	24	1	0.378788	1	0.378788
chrX: p22.13	28	0	0	2	0.649351
chrX: p22.2	103	4	0.353045	6	0.529568
chrX: p22.31	24	1	0.378788	0	0
chrX: p22.32	4	1	2.27273	1	2.27273
chrX: p22.33	64	1	0.142045	0	0
chrX: q12	22	3	1.23967	1	0.413223
chrX: q13.1	90	1	0.10101	4	0.40404
chrX: q13.2	40	0	0	7	1.59091
chrX: q21.1	72	5	0.631313	1	0.126263
chrX: q21.32	3	0	0	2	6.06061
chrX: q22.1	83	8	0.876232	15	1.64294
chrX: q22.2	33	1	0.275482	1	0.275482
chrX: q22.3	48	2	0.378788	12	2.27273
chrX: q23	58	4	0.626959	12	1.88088
chrX: q24	66	3	0.413223	3	0.413223
chrX: q25	38	0	0	2	0.478469
chrX: q26.2	33	12	3.30579	5	1.37741
chrX: q26.3	73	3	0.373599	13	1.61893
chrX: q27.1	21	0	0	2	0.865801
chrX: q28	189	12	0.577201	1	0.0481
chrY: p11.31	13	1	0.699301	1	0.699301
chrY: q11.222	22	7	2.89256	4	1.65289
chrY: q11.23	8	0	0	2	2.27273
