# Supplementary material for: Prediction of Potential Cancer-Risk Regions Based on Transcriptome Data: Towards a Comprehensive View
Source: PLoS One. 2014 May 5;9(5):e96320. doi: 10.1371/journal.pone.0096320 (PMC4010480; doi:10.1371/journal.pone.0096320)
Supplement: Table S16 — Percentage of chromosome participation for total differentially expressed probsets (with at least 2 fold change) during total 11 cancers. (XLSX) [file pone.0096320.s022.xlsx]

## Sheet: Table 16
Table S16 Percentage of chromosome participation for total differentially expressed probsets (with at least 2 fold change) during total 11 cancers.
Chromosome	Frequency of total probsets (FCTP)	Frequency of over-expressed probsets (FOC) (Summation of 11 cancers)	Percentage of chromosome participation for over expressed locus(%)	Frequency of down-expressed probsets (FDC) (Summation of 11 cancers)	Percentage of chromosome participation for down expressed (%)
Chr1	5362	2155	0.037	1918	0.0325
Chr2	3826	1384	0.033	1577	0.0375
Chr3	3175	1007	0.029	1371	0.0393
Chr4	2219	661	0.027	1404	0.0575
Chr5	2553	779	0.028	1347	0.048
Chr6	2897	842	0.026	1337	0.042
Chr7	2703	1028	0.035	978	0.0329
Chr8	1958	760	0.035	931	0.0432
Chr9	2124	594	0.025	864	0.037
Chr10	2206	622	0.026	977	0.0403
Chr11	2938	869	0.027	1202	0.0372
Chr12	2777	1103	0.036	1064	0.0348
Chr13	1250	334	0.024	595	0.0433
Chr14	1794	482	0.024	699	0.0354
Chr15	1768	544	0.028	707	0.0364
Chr16	2075	578	0.025	662	0.029
Chr17	2884	683	0.022	901	0.0284
Chr18	975	260	0.024	405	0.0378
Chr19	2855	700	0.022	650	0.0207
Chr20	1512	462	0.028	348	0.0209
Chr21	683	227	0.03	232	0.0309
Chr22	1239	281	0.021	306	0.0225
Chr x	1675	617	0.033	718	0.039
Chr y	119	33	0.025	23	0.0176
